1 **Full title**

2 **Effects of methionine supplementing on intestine, liver and uterus morphology, and on positivity**  
3 **and expression of calbindin-D28k and TRPV6 calcium carriers in laying quails in thermoneutral**  
4 **conditions and under thermal stress**

5

6 **Short title**

7 **Calcium carries in laying quails under thermal stress and methionine supplementation**

8

9 Lanuza Ribeiro de Moraes<sup>1</sup>, Maria Eduarda Araújo Delicato<sup>2</sup>, André da Silva Cruz<sup>2</sup>, Hugo Thyares  
10 Fonseca Nascimento Pereira da Silva<sup>2</sup>, Clara Virgínia Batista de Vasconcelos Alves<sup>2,3,3</sup>, Danila Barreiro  
11 Campos<sup>1</sup>, Edilson Paes Saraiva<sup>3</sup>, Fernando Perazzo da Costa<sup>3</sup>, Ricardo Romão Guerra<sup>1,3\*</sup>

12

13 <sup>1</sup> Programa de Pós-Graduação em Ciência Animal, Universidade Federal da Paraíba, Areia, Paraíba,  
14 Brazil, <sup>2</sup> Departamento de Ciências Agrárias, Universidade Federal da Paraíba, Areia, Paraíba, Brazil,  
15 <sup>3</sup> Programa de Pós-Graduação em Zootecnia, Universidade Federal da Paraíba, Areia, Paraíba, Brazil

16

17 \*Corresponding author

18 \*e-mail: rromaoguerra@gmail.com

19

20

21

## 22 **Abstract**

23 The aim of this study was to provide support for the performance, localization and expression of the  
24 epithelial calcium transporter channels, calbindin-D28k (Calb) and TRPV6, and of the morphology of the  
25 digestive and reproductive system of laying quails under heat stress, and with methionine  
26 supplementation. Therefore, the present study characterized the positivity (immunohistochemistry) and  
27 expression (real-time PCR) of calcium channels (Calb and TRPV6) in the kidneys, intestine and uterus of  
28 504 laying quails that were submitted to different methionine supplementation (100, 110 and 120%) and  
29 temperatures (20, 24, 28 and 32°C). The animals under thermal stress had lower villus height, villus:crypt  
30 ratio, and goblet cell index in the duodenum and jejunum, fewer secondary and tertiary uterine folds,  
31 smaller hepatic steatosis, and increased number of distal convoluted renal tubules (CT) positive to Calb  
32 (protein), and increased positivity in proximal CTs. The deleterious effects of heat stress were minimized  
33 with methionine supplementation for the following variables: duodenal crypts, number of goblet cells of  
34 the jejunum, number of uterine folds, decreased Calb positivity in intestines and kidney, increased  
35 positivity of Calb in the uterus and increased TRPV6 gene expression in the kidney. Calcium transporters  
36 were altered due to less need for calcium absorption and reabsorption due to more calcium available with  
37 the supplementation, increasing egg production and quality. Methionine supplementation further  
38 increased intestinal villus absorption area and height, increased steatosis, decreased Calb positivity in the  
39 intestine and kidney, increased uterine positivity and Calb expression, and increased TRPV6 expression  
40 in the uterus under thermoneutrality. This is the first study that describes the gene and protein expression  
41 of calcium transporters in the intestine, kidney and uterus of laying quails, and concludes that the use of  
42 methionine supplementation is justifiable in order to partially reverse the deleterious effects of thermal  
43 stress on the production.

44

45

46

## 47 Introduction

48 Quail laying farming has been growing in Brazil, mainly in the northeast region [1]. The raising of  
49 quails is a very profitable activity and with broad perspectives, which induces the development of  
50 research aiming at better production, perfecting techniques and alternatives to reach quality standards and  
51 expansion throughout the territory.

52 In tropical climates, such as those found in most of Brazil, laying birds suffer a reduction in their  
53 zootechnical indexes as well as an increase in mortality as a result of thermal stress, leading to productive  
54 and economic losses in production [2]. This fact is mainly observed in laying quail farming, where the  
55 first restrictive factor for eggshell formation is calcium, and calcium is negatively influenced by  
56 temperature increase [3].

57 Calcium comes mainly from intestinal absorption and bone resorption, which is mobilized from  
58 the blood to the uterus very quickly [4,5]. Nascimento et al. [6] stated that 70% of the production cost is  
59 based on food, and for this reason there is a need to develop balanced diets according to the needs of the  
60 birds, enabling them to use the diet with maximum efficiency.

61 For birds subjected to heat stress, it is necessary to supplement the diets with glycogenic amino  
62 acids, such as methionine, cystine and others [7]. Under such conditions of thermal stress, physiological  
63 and behavioral changes occur in quails, which severely affect feed intake and cause structural changes in  
64 the intestinal epithelium, reducing nutrient digestibility and absorption [8].

65 Methionine, classified as an essential amino acid [9], is also the first limiting factor in poultry  
66 feed, and is essential for the maintenance, growth, production, and development of feathers [10]. In  
67 addition to the productive responses obtained with methionine supplementation in laying hens, studies of  
68 the morphological analyses of the laying digestive and reproductive system of broilers and light birds  
69 indicate favorable quantitative and qualitative changes, such as an increase in egg mass by 10%. [11,12],  
70 decreased laying fat [13], increased eggshell thickness [14], and increased intestinal villi [15], which  
71 provide and technically justify the improvement in zootechnical indexes of these animals with methionine  
72 use [15-18].

73 Evaluating the existing literature [15-18], diets supplemented with methionine at levels above  
74 NRC (National Research Council) recommendation, can be a nutritional strategy to minimize heat stress  
75 damage, by improving the performance of laying birds in warmer regions. Such studies are scarce in  
76 laying hens and even more so in laying quails.

77 Thus, due to the gap in research related to the subject described, the objective was to evaluate the  
78 effect of methionine supplementation on intestinal morphology; on the villus:crypt ratio; on the quantity  
79 of goblet cells; on liver glycogen storage and steatosis; on uterine morphology in thermoneutral laying  
80 quails, and under high temperature heat stress. Furthermore, the objective was to evaluate positivity and  
81 gene expression of calbindin-D28k and TRPV6 calcium channels in laying birds under the same  
82 conditions, in order to evaluate the alteration of these channels due to methionine supplementation in  
83 thermoneutral laying birds and under thermal stress, since they are described as the main calcium carriers,  
84 acting on laying quails intestines, kidneys and uterus [19,20].

## 85 **Material and Methods**

86 A total of 504 Japanese quails in production stage (second cycle) were used, distributed in a  
87 completely randomized design in a 3x4 factorial scheme, with three levels of methionine (100%, 110%  
88 and 120%) and four temperature ranges (20 24, 28 and 32°C), representing thermoneutral and thermal  
89 stress ranges, totaling twelve treatments. Diets were formulated according to NRC (National Research  
90 Council) recommendation (Table 1).

91

92

93

94

95

96

97 **Table 01. Experimental diets containing three levels of methionine supplementation for laying**  
 98 **quails.**

| Ingredientes                | T1                       | T2                         | T3                          |
|-----------------------------|--------------------------|----------------------------|-----------------------------|
|                             | 100% Met+Cys<br>(0.888%) | 100+10%Met+Cys<br>(0.977%) | 100+20% Met+Cys<br>(1.066%) |
| Corn, 788%                  | 58.466                   | 58.466                     | 58.466                      |
| Soybean meal, 45%           | 30.071                   | 30.071                     | 30.071                      |
| Soyabean oil                | 0.906                    | 0.906                      | 0.906                       |
| Calcitic limestone          | 7.041                    | 7.041                      | 7.041                       |
| Dicalcium phosphate, 18.5%  | 1.142                    | 1.142                      | 1.142                       |
| Salt                        | 0.326                    | 0.326                      | 0.326                       |
| L-Lisin HCl                 | 0.342                    | 0.342                      | 0.342                       |
| L-Threonine                 | 0.078                    | 0.078                      | 0.078                       |
| L-Tryptophan                | 0.040                    | 0.040                      | 0.040                       |
| Choline chloride, 60%       | 0.070                    | 0.070                      | 0.070                       |
| Mineral premix              | 0.050                    | 0.050                      | 0.050                       |
| Vitaminic Premix            | 0.025                    | 0.025                      | 0.025                       |
| Antioxidant                 | 0.010                    | 0.010                      | 0.010                       |
| DL-Methionine               | 0.441                    | 0.537                      | 0.633                       |
| Starch                      | 0.673                    | 0.536                      | 0.400                       |
| Inert                       | 0.319                    | 0.360                      | 0.400                       |
| TOTAL, kg                   | 100.00                   | 100.00                     | 100.00                      |
| <b>Chemical composition</b> |                          |                            |                             |
| PB, %                       | 18.80                    | 18.80                      | 19.00                       |
| EM, kcal/kg                 | 2800                     | 2800                       | 2800                        |
| Met digestible, %           | 0.685                    | 0.779                      | 0.870                       |
| Met + Cis digestible, %     | 0.942                    | 1.036                      | 1.130                       |
| Lis digestible, %           | 1.148                    | 1.148                      | 1.148                       |
| Thre digestible, %          | 0.701                    | 0.701                      | 0.701                       |
| Val digestible, %           | 0.785                    | 0.785                      | 0.785                       |
| Trp digestible, %           | 0.241                    | 0.241                      | 0.241                       |
| Arg digestible, %           | 1.152                    | 1.152                      | 1.152                       |
| Ile digestible, %           | 0.717                    | 0.717                      | 0.717                       |
| Leu digestible, %           | 1.485                    | 1.485                      | 1.485                       |
| Calcium, %                  | 2.99                     | 2.99                       | 2.99                        |
| Available match, %          | 0.31                     | 0.31                       | 0.31                        |
| Sodium, %                   | 0.15                     | 0.15                       | 0.15                        |
| Chlorine, %                 | 0.24                     | 0.24                       | 0.24                        |
| Potassium, %                | 0.72                     | 0.72                       | 0.72                        |
| BE, mEq/kg                  | 179.00                   | 179.00                     | 179.00                      |

99

100

## 101 **Histological Processing**

102 Histological processing was performed at the Histology Laboratory of the Center for Agrarian  
103 Sciences of the Federal University of Paraíba. Biological samples of intestine (duodenum and jejunum),  
104 liver, uterus and kidney from 8 randomly chosen animals from each treatment were collected and fixed in  
105 Metacarn [21] for 12h and embedded in paraffin. The cuts were made with 5 $\mu$ m thickness. Hematoxylin-  
106 eosin staining and Periodic Acid Schiff (PAS) were used depending on the analysis, and digitized images  
107 were captured on an Olympus BX-60 microscope and a Olympus camera coupled with a Olympus  
108 cellSens Dimension digital imaging program. Samples of the duodenum were collected 4 cm after the  
109 ventricle and samples of the jejunum were collected in the middle region of this segment. Both were  
110 included in a transverse direction, so that it was possible to visualize the intestinal villi as well as the  
111 lumen of the organ. Kidney and liver samples were collected so as never to exceed 0.5 cm<sup>3</sup> for adequate  
112 tissue fixation. Uterine samples were collected in the middle lateral region with a dimension of 1 cm<sup>2</sup>.

113 Histomorphometry analyses were performed by a single histologist to avoid misinterpretation.  
114 ANOVA and Tukey's post test at 5% significance level were used to evaluate the influence of methionine  
115 supplementation on different temperature types.

## 116 **Duodenal and Jejunal Morphology**

117 Five photomicrographs were digitized in eight animals from each treatment, and two  
118 measurements in each image, totaling 80 measurements (8 animals x 5 photomicrographs x 2  
119 measurements) of intestinal villi height and their respective crypts from each treatment, by means of a  
120 Olympus cellSens Dimension image analyzer and a Olympus digital camera attached to an Olympus BX-  
121 60 microscope. Villus height measurements were taken from its base to its apex; width was measured at  
122 the middle portion of each villus, and the crypt was measured from the base of its respective villus. The  
123 Villus:Crypt Ratio was given by dividing the Villus Height by its respective Crypt.

124 To quantify the goblet cell index in the duodenum and jejunum epithelium, histological slides  
125 from eight animals per treatment stained with PAS staining magenta on the goblet cells were used.

126 Images were captured and digitized with the 20x objective of the intestinal villi. At least 2 images from  
127 each animal were randomly chosen and the intestinal epithelium was measured linearly to 2000  $\mu\text{m}$ , and  
128 the number of goblet cells per 500  $\mu\text{m}$  was counted, making a sample of 32 per treatment (8 animals x 4  
129 areas of 500  $\mu\text{m}$ ). Based on the results, the number of goblet cells in 1,000 micrometers for each  
130 treatment was defined based on a rule of three.

## 131 **Measurement of hepatic glycogen storage and hepatic steatosis**

132 For the measurement of hepatic glycogen storage, after the aforementioned histological processing  
133 and PAS staining, 5 photomicrographs of 8 animals from each treatment, chosen at random, were  
134 analyzed by optical microscopy by the same histologist, without his previous knowledge about the group  
135 belonging to each bird, totaling a sample of 40 per treatment (8 animals x 5 micrographs). The  
136 photomicrographs were classified according to the degree of glycogen deposition due to the positivity to  
137 PAS histochemistry: Grade +: little hepatic glycogen deposition; Grade ++: moderate hepatic glycogen  
138 deposition; and Grade +++: marked hepatic glycogen deposition. For analysis of the hepatic glycogen  
139 deposition index, the crosses were transformed into corresponding numbers (+ = 1, ++ = 2, +++ = 3) to  
140 perform the statistics according to the modified Ishak Semi Quantitative Score [22].

141 To evaluate hepatic steatosis, an evaluation score was assigned to each liver analyzed by liver  
142 photomicrographs of each animal (8 animals per treatment), totaling a sample number of 40 per treatment  
143 (8 animals x 5 photomicrographs), considering the amount and the size of the hepatocyte lipid  
144 cytoplasmic vacuoles: 0 (absence of steatosis), 1 (low steatosis), 2 (moderate steatosis) and 3 (advanced  
145 steatosis), following the modified Ishak Semi Quantitative Score [22]. For each treatment an average was  
146 obtained, which was submitted to statistics.

## 147 **Uterine Morphology**

148 After histological processing and the PAS histochemical staining, digital images were captured.  
149 Photomicrographs, 5 of each one of the 8 animals per treatment, totaling a sample number of 40, were  
150 evaluated according to the presence and quantity of uterine folds, and were evaluated according to

151 modified Ishak Semi-Quantitative Score [22]. Score 1 was given for the presence of primary folds only,  
152 score 2 for primary and some secondary folds, score 3 for the presence of primary, secondary and some  
153 tertiary folds, and score 4 for uterus with numerous tertiary folds. The photomicrographs were analyzed  
154 under optical microscopy by the same histologist, without his previous knowledge about the group  
155 belonging to each bird.

## 156 **Immunohistochemistry for anti-Calbindin-D28k**

157 Histological slides containing duodenum, jejunum, uterus and kidney from 6 animals per  
158 treatment were chosen randomly. The antibody was calbindin-D28K (Sigma, Clone Cl3000). The slides  
159 were dehydrated, blocked with 3 hydrogen peroxide baths for 10 minutes each and washed with  
160 phosphate buffer (PBS) 3 times for 3 minutes. The unmasking was performed with citrate buffer (pH 6.0)  
161 for 10 minutes in microwave, waiting for the temperature to drop for another 20 minutes. The slides were  
162 again washed in PBS and incubated at 4°C overnight with antibody diluted in PBS (1:200). The following  
163 day, the the slides were placed biotinylated secondary antibody for 15 minutes, followed by incubation in  
164 streptavidin peroxidase complex (DAKO-LSAB) for 30 minutes. Positive cells were labeled by DAB  
165 chromogen (DAKO) for 5 minutes. The photomicrographs were performed by the KS-400 Zeiss  
166 programs under Olympus BX60 microscope and AxioCam camera. The more antibody-positive, the  
167 higher the protein production of calbindin-D28k.

## 168 **Real-Time PCR (qPCR) for TRPV 6 and Calbindin-D28k**

169 Duodenum and jejunum, kidney and uterus samples from 6 randomly selected animals per  
170 treatment were used. For RNA extraction, two protocols were used, PureLinkTMRNA Mini Kit - Thermo  
171 Fisher Scientific and ReliaPrep™ RNA TissueMiniprep System. RNA samples were kept in the Ultra  
172 Freezer at -80°C until cDNA Synthesis was performed using the Invitrogen™, Super Script™, IV Master  
173 Mix VILO™ with Enzima ezDNase™.

174 QPCR was performed by using MxPro - Mx3005P v4.10 Build 389, Schema 85 (Stratagene®,  
175 United States). All qPCR reactions used SYBR® Brilliant III Ultra-Fast QBRR Green Prime Mix Low



176 ROX (Agilent Technologies). Beta Actin was used as an endogenous control, and all oligonucleotides  
177 were obtained from Japanese quail DNA sequences previously published in the PubMed gene bank, and  
178 primer sequences were obtained from Primer3Plus - Bioinformatics (Table 2). Amplification conditions  
179 were 3 minutes at 95°C followed by 40 cycles of 15 seconds at 95°C and 20 seconds at 60°C; 1 minute at  
180 95°; 30 seconds at 55°, and finally 30 seconds at 95°.

181 Melting curve analysis allowed the evaluation of the specificity of qPCR products. Samples were  
182 run in triplicate for each sample and relative quantification (target gene/endogenous control) determined  
183 their expression. Data were normalized to a calibrator sample using the  $\Delta\Delta C_t$  method with correction for  
184 amplification efficiency [23].

185 **Table 02. Sequence of primers used for quantitative PCR – real time for quails.**

| Genes              | qPCR Primers (5'-3')                                 | GenBank Number |
|--------------------|------------------------------------------------------|----------------|
| <i>Calbindin28</i> | >GACGGCAATGGGTACATGGA<br><TCGGGTGTTAAGTCCAAGCC       | XM_015855985.1 |
| <i>TRPV6</i>       | >CCATCATTGCCACCCTCCTT<br><AGCAACAATCTGGGCTCTCC       | XM_015873874.1 |
| <i>Beta Actina</i> | >CCACTGGCATTGTCATGGACTCT<br><TCCTTGATGTCACGGACGATTTC | X00182.1       |

186 > = forward, < = reverse

187

## 188 **Statistical analysis**

189 Data were subjected to analysis of variance (ANOVA) and, according to the significance of the F  
190 test ( $P \leq 0.05$ ), the means were compared by the SNK test (Student-Newman-Keuls) at up to 5%  
191 probability of error. These analyses were performed by using the SAS<sup>®</sup> University Edition [24]. Pearson  
192 correlation analysis was also performed using the JMP<sup>®</sup> Pro 13. Data were represented by means  $\pm$   
193 standard deviation.

## 194 **Results and Discussion**

### 195 **Histology**

## 196 Duodenal and Jejunal Morphology

197 From the histomorphometric analysis of the intestine, it was found that the villus height variable  
 198 (AV) in laying quails is reduced during heat stress in the duodenum and jejunum (Table 3), corroborating  
 199 Mitchell and Carlisle [25], who observed decrease in jejunal villus height of broilers kept under constant  
 200 thermal stress compared to birds in thermoneutrality.

201 **Table 3. Morphometry of the digestive and breeding system of laying Japanese quail (*Coturnix***  
 202 ***japonica*) supplemented (S) with methionine at levels of 100%, 110% and 120% submitted to**  
 203 **different temperatures (20°, 24°, 28° and 32°C).**

| Variable                      | S % | Temperature (°C) |                |                 |                  |
|-------------------------------|-----|------------------|----------------|-----------------|------------------|
|                               |     | 20               | 24             | 28              | 32               |
| Duodenum<br>VH                | 100 | 860.85±140.49aB  | 808.93±73.59bB | 811.22±97.36bA  | 822.56±107.17abA |
|                               | 110 | 673.9±106.13cC   | 856.47±90.46aA | 829.90±127.27aA | 757.96±73.81bB   |
|                               | 120 | 937.65±113.96aA  | 886.30±90.76bA | 760.13±67.55cB  | 729.15±68.09dC   |
| Jejunum VH                    | 100 | 631.19±95.47bB   | 678.79±60.45aA | 653.87±83.03abA | 676.65±77.91aA   |
|                               | 110 | 628.78±98.38aB   | 564.32±51.51bB | 578.69±129.69bB | 575.78±85.11bB   |
|                               | 120 | 691.92±66.93aA   | 656.45±69.34bA | 547.94±113.41cB | 557.35±77.37cB   |
| Duodenum<br>CD                | 100 | 46.37±9.69bB     | 54.43±11.33aA  | 49.97±9.60abA   | 45.25±7.04bcAB   |
|                               | 110 | 49.97±9.94aB     | 48.92±8.21aB   | 47.77±8.67aAB   | 44.17±6.88bB     |
|                               | 120 | 57.40±13.31aA    | 48.93±8.91bB   | 44.84±7.73cB    | 47.57±7.85bcA    |
| Jejunum CD                    | 100 | 37.27±5.89cB     | 40.60±7.68bB   | 45.79±7.53aA    | 44.59±6.70aA     |
|                               | 110 | 39.72±6.91bAB    | 39.83±6.47bB   | 40.83±5.90abB   | 42.36±4.78aA     |
|                               | 120 | 41.12±7.64bA     | 44.84±7.33aA   | 41.11±8.03bB    | 44.13±6.02aA     |
| Villous:<br>Crypt<br>Duodenum | 100 | 19.38±5.20aA     | 15.49±3.38bB   | 16.66±3.08bA    | 18.45±2.91abA    |
|                               | 110 | 14.05±3.69bC     | 17.93±3.20aA   | 17.89±4.01aA    | 17.58±3.28aA     |
|                               | 120 | 16.88±2.92bcB    | 18.84±3.57aA   | 17.41±3.16bA    | 15.71±2.85cB     |
| Villous:<br>Crypt<br>Jejunum  | 100 | 17.16±2.79aA     | 17.18±2.93aA   | 14.61±2.74bA    | 15.52±2.94bA     |
|                               | 110 | 15.99±2.13aB     | 14.55±2.83abB  | 14.40±3.55abA   | 13.78±2.67bB     |
|                               | 120 | 17.35±3.41aA     | 14.98±2.68bB   | 13.46±2.24bcA   | 12.80±2.17cB     |
| GC<br>Duodenum                | 100 | 27.71±8.56abB    | 31.38±7.65aA   | 30.50±9.93aA    | 23.33±7.61bB     |
|                               | 110 | 42.79±15.33aA    | 31.08±6.66bcA  | 36.00±6.78bA    | 27.21±4.23cAB    |
|                               | 120 | 33.08±9.05aB     | 25.13±8.36bB   | 35.58±7.92aA    | 30.46±6.09abA    |
| GC Jejunum                    | 100 | 36.25±6.53abA    | 32.67±7.88bB   | 40.13±11.16aA   | 43.42±11.99aA    |
|                               | 110 | 39.17±10.56bA    | 49.04±12.16aA  | 38.42±8.80bA    | 39.75±7.89bA     |
|                               | 120 | 39.38±10.73aA    | 42.88±11.22aA  | 40.21±8.06aA    | 44.67±8.84aA     |
| Uterine folds                 | 100 | 3.11±0.68aA      | 3.12±0.99abA   | 2.87±0.64bcB    | 2.28±0.83cA      |
|                               | 110 | 3.06±0.73aA      | 3.22±0.73aA    | 3.06±1.06aA     | 2.39±0.61bA      |
|                               | 120 | 3.43±0.51bA      | 3.50±0.71aA    | 2.28±0.75bB     | 2.83±0.71bA      |
| Hepatic<br>steatosis          | 100 | 1.17±0.59abA     | 1.43±0.97aA    | 0.70±0.75bB     | 0.87±0.78abA     |
|                               | 110 | 1.07±0.64aA      | 0.87±1.07aB    | 0.60±0.67aB     | 0.90±0.80aA      |
|                               | 120 | 1.10±0.84abA     | 1.57±1.19aA    | 1.43±1.04abA    | 0.87±1.01bA      |

|                     |     |             |             |             |             |
|---------------------|-----|-------------|-------------|-------------|-------------|
| Hepatic<br>glycogen | 100 | 1.17±0.38aA | 1.30±0.53aB | 1.43±0.63aA | 1.43±0.63aA |
|                     | 110 | 1.17±0.38bA | 2.53±0.63aA | 1.03±0.18bB | 1.27±0.45bA |
|                     | 120 | 1.43±0.50aA | 1.00±0.00bB | 1.50±0.51aA | 1.43±0.68aA |

204

205

206 Averages followed by the same letter lowercase in the row and uppercase in the column do not differ by Tukey's  
207 test up to 5% probability; VH: villus height; CD: crypt depth; Villus: Crypt: Villus Relationship: Crypt; GC: Globet  
208 cells.  
209

210 Supplementation with 120% methionine provided higher villus height (VH) at thermoneutral  
211 temperatures of 20 and 24°C, but not at higher temperatures, including thermal stress temperatures  
212 (32°C). Thus, methionine supplementation is ineffective at reversing the harmful effects of heat stress for  
213 VH. Supplementation with 120% methionine even led to decreased VHs at the temperature of 32°C. Such  
214 event, without contextualize the crypt depth (CD), leads to believe in the reduction of intestinal area and  
215 consequent lower contact with food, decrease of nutrient absorption and production.

216 In the jejunum, the effects were similar; supplementation with 120% methionine promoted VH  
217 increase at 20°C, maintained VH at 24°C, and also reduced VH at 28 and 32°C. Thus, methionine  
218 supplementation was also not effective in minimizing the deleterious effects of heat stress on this small  
219 intestine segment.

220 The negative effects of high ambient temperature are known and have been reported by Marchini  
221 et al. [27], where high ambient temperature up to the fourth week of age promoted reduction in digestive  
222 enzyme secretion and in the VH of broilers.

223 According to some authors, food digestibility and intestinal mucosal integrity are strongly related  
224 to ambient temperature variations. Thus, the low amount of food present in the gastrointestinal tract  
225 during thermal stress also impairs the trophic stimulation of the intestinal mucosa, besides decreasing the  
226 secretion of digestive enzymes [27]. At high temperatures, feed intake is decreased in an attempt to  
227 decrease endogenous heat production that could cause damage to intestinal morphology and integrity,  
228 compromising digestion and absorption mechanisms and thereby reducing bird performance [26]. Thus,  
229 such a reduction may have led to lower methionine consumption at 32°C, and compromising the expected

230 effect of methionine in reversing, at least in part, the deleterious effects of VH heat stress in both  
231 duodenum and jejunum. Animals kept at the lowest temperatures in this study maintained their feed  
232 intake, thus explaining the increase in duodenal villus means. However, the use of methionine  
233 supplementation for this variable would not be justified, and is therefore not recommended.

234 Although methionine supplementation (120%) has not been shown to increase duodenal and  
235 jejunal villi under heat stress, and thus reverse the deleterious effects on intestinal morphology, it can be  
236 effective in increasing the absorption area (increased VH) in thermoneutrality.

237 Intestinal crypts are related to the intestinal health of the animal, the greater the crypt depth (CD),  
238 the greater the villous regeneration due to possible injuries (mechanical and/or other pathogenic  
239 mechanisms) occurred, or due to villous growth related to animal growth [28], becoming an important  
240 variable to be analyzed. Thus, the increase in CD can also predict an increase in VH when a trophic agent  
241 is presented, because it is exactly in this region that the cells that will migrate are produced to ensure the  
242 maintenance and/or increase of VH.

243 The histomorphometric analysis of CD in the duodenum showed that at thermoneutral  
244 temperatures for quails, the CD was lower, that is, the temperature of thermal stress (32°C) and at the  
245 lowest temperature (20°C), close to the thermal stress by low temperature, there is a higher need for cell  
246 turnover. However, 120% methionine supplementation led to a decrease in CD at higher temperatures (28  
247 e 32°C). It can be inferred that at high temperatures, methionine supplementation reduced the deleterious  
248 effects of stress, reducing the need for cell proliferation in this region. The same result found for  
249 duodenum in relation to methionine supplementation was found in the jejunum. Regarding temperature,  
250 CD was different only at 20°C; it was lower at this temperature. The results show that methionine  
251 supplementation at high temperatures leads to a decrease in CD, which leads to a greater villus:crypt  
252 ratio, a variable used as an important marker of intestinal health, as it reveals a larger area of contact with  
253 food, consequently increased absorption without the need for too much energy expenditure on crypt  
254 turnover.

255 Crypt epithelium hyperplasia found at 32°C must have been induced to reestablish villus height,  
256 and is considered a compensatory mechanism [29], since thermal stress by heat in broilers for four  
257 consecutive days causes negative alterations in duodenum and jejunum crypts, including reduction in  
258 villus height, in villus/crypt ratio, in absorption area, and increased crypt depth.

259 The villus:crypt ratio (VCR) is related to the intestinal health of the animal, the higher the ratio,  
260 the greater its intestinal health. The results showed that the reduction of CD found in methionine  
261 supplementation at high temperatures (28 and 32°C) in the duodenum and jejunum did not translate into  
262 higher VCR. In contrast, at 32°C, VCR was lower in both intestinal segments after methionine  
263 supplementation. The improvement in intestinal health seen from the increase in VCR was only observed  
264 at a temperature of 24°C at duodenal level. These results show that methionine supplementation in laying  
265 quails under thermal stress does not reverse the deleterious effects of heat on VCR. Regarding the  
266 different temperatures, the increase of this variable also led to a decrease in intestinal health, that is, lower  
267 VCR.

268 These results corroborate Wu et al. [30], which report that thermal stress by heat is detrimental to  
269 the integrity of the intestinal mucosa of broilers, where the villi become shorter and flatter, and  
270 consequently the crypt increases its activity by becoming deeper in an attempt to reverse this situation,  
271 with this the VCR decreases. According to the authors, high ambient temperature reduces feed intake of  
272 birds [30], justifying the reduction in VCR at high temperature. This leads to less energy available for  
273 maintenance and renewal of the intestinal mucosa and consequently for production.

274 Goblet cells (GC) play an important role in the digestive system of animals; the quantity of GC  
275 even indicates the degree of intestinal health. GC produce mucus, mucin, which protects the intestinal  
276 epithelium from infectious agents and mechanical agents, and forms the glycocalyx which also plays an  
277 important role in intestinal digestion [31]. It is well known, as happened in the present study at the  
278 duodenal level (reduction of GC at 32°C), that high temperatures decrease the quantity and production of  
279 GC, thereby reducing intestinal health. Sandikciet al. [32] reported significant reduction in GC in the  
280 three intestinal segments, in addition to villus height, in Japanese quails subjected to thermal stress.

281 According to the authors, it is especially possible to relate the damage observed in intestinal mucosa,  
282 including decreased GC, to low feed intake during thermal stress [33]. Unlike in the literature [32] for  
283 chickens, rising temperatures did not decrease jejunum GC, perhaps because quails are more heat tolerant  
284 than laying hens.

285 Methionine supplementation led to an increase in GC during thermal stress (32°C) in the jejunum.  
286 These results demonstrate that methionine supplementation in heat stress reverses the deleterious effects  
287 of heat on the jejunum, but not on the duodenum. The increase in GC found in the jejunum under  
288 conditions that mimic thermal stress by heat provides better protection of the intestinal mucosa and better  
289 digestion, leading to improved intestinal health [34], thus justifying the use of methionine  
290 supplementation in this case.

291 Climate warming has been causing concern for quail farming, since, as results show, thermal  
292 stress by heat promotes various alterations in behavior and physiological mechanisms of quails,  
293 culminating in harmful morphological alterations, poor bird performance, and economic losses for the  
294 sector [35].

## 295 **Uterine Histomorphometry**

296 For the first time in quails, morphometric results showed that the increase of temperature, that is,  
297 thermal stress (32°C), causes decrease in the uterine folds, mainly in the secondary and tertiary folds  
298 (Table 3), which implies in a smaller area for the production of calcium carbonate, the main eggshell  
299 compound [3], negatively influencing the egg production of the animals. High temperatures also  
300 decreased eggshell production and thickness (Table 4). The highest indexes of uterine folds were found in  
301 treatments at 20 and 24°C.

302

303

304

305 **Table 4. Average productive performance and eggshell thickness of laying quails submitted to**  
 306 **methionine supplementation at 3 levels (100, 110 and 120%) and 4 temperature ranges varying**  
 307 **from thermoneutrality to heat stress.**

| Level x Temp | Production % 2 <sup>o</sup> Period    |              |               |               |
|--------------|---------------------------------------|--------------|---------------|---------------|
|              | 20°C                                  | 24°C         | 28°C          | 32°C          |
| 100%         | 89.55±3.70aA                          | 92.2±4.42aA  | 85.24±4.41aA  | 83.81±14.94aA |
| 110%         | 91.67±3.40aA                          | 91.27±6.02aA | 85.32±5.21abA | 76.98±11.35bA |
| 120%         | 93.52±8.54abA                         | 98.23±9.78aA | 85.3±6.77bcA  | 74.78±6.78cA  |
|              | Shell thickness 2 <sup>o</sup> Period |              |               |               |
|              | 20°C                                  | 24°C         | 28°C          | 32°C          |
| 100%         | 0.27±0.02aA                           | 0.25±0.01bA  | 0.26±0.02abA  | 0.25±0.01bA   |
| 110%         | 0.27±0.01aA                           | 0.25±0.01aA  | 0.26±0.01aA   | 0.26±0.02aA   |
| 120%         | 0.27±0.01aA                           | 0.26±0.01aA  | 0.27±0.01aA   | 0.26±0.01aA   |

308 Means followed by the same lowercase letter in the rows and uppercase in the columns do not differ by Tukey's test  
 309 up to 5% probability.

310 These results corroborate the egg production results (Table 4); the highest productive performance  
 311 was found at 24°C, and the lowest performance was at 32°C.

312 Although the literature mentions that methionine supplementation increases the amount of folds in  
 313 the uterus in layers and light birds [15-18], this was not observed when heat stress was applied in this  
 314 study on quails. There was an increase in the uterine fold index only at 28°C with 110% methionine  
 315 supplementation; however, these results did not interfere with egg production (Table 4). We can infer that  
 316 methionine supplementation, except 110% at 28°C, does not minimize the deleterious effects of heat  
 317 stress on uterine folds in quails.

### 318 **Measurement of hepatic glycogen and steatosis storage**

319 The increase in ambient temperature decreased the hepatic steatosis index, with the highest  
 320 indexes at 20 and 24°C. Methionine supplementation (120%) increased this rate only at 24°C. This result  
 321 differs from that found by Bunchasak et al. [14], who describe that the higher the methionine  
 322 supplementation the higher the fatty acid synthesis in laying hens, and thus the higher the rate of hepatic  
 323 steatosis. This variable is important since the increase in hepatic steatosis is related to estrogen  
 324 production, that is, the higher the steatosis, the higher the estrogen production and the higher the egg

325 production [14]. Thus, methionine supplementation (120%) at 24°C would not only increase hepatic  
326 steatosis but also egg production by these quails, which occurred in the present study, since the increase  
327 in hepatic steatosis was reflected in a significant increase in production (Table 4). In contrast, birds  
328 subjected to a temperature of 20°C, despite not showing an increase in steatosis, had increased egg  
329 production (Table 4).

330 Hepatic glycogen levels did not appear to change with the alteration in ambient temperature,  
331 corroborating studies on broilers by Lana et al. [36]. However, these studies were contrary to the results  
332 for broilers, which showed decreased hepatic glycogen stores, as well as reduced feed intake and weight  
333 gain [37], and reduced liver weight [38] with consequent reduction in metabolic activity under thermal  
334 stress.

335 However, only at 24°C, 110% methionine supplementation increased hepatic glycogen stores.  
336 These results demonstrate that at thermoneutrality, 110% supplementation maximizes energy storage in  
337 the form of glycogen in the liver. Such a surplus can be transferred to production, in this case in egg  
338 production. Thus, in heat stress methionine supplementation was not efficient.

## 339 **Immunohistochemistry**

340 In modern strains of laying hens, which can be extrapolated to laying quails, the equivalent of  
341 10% of total body calcium is transferred daily for deposition as eggshells [39-41]; the major sources of  
342 calcium are through absorption from the diet at the intestinal level, renal resorption, and bone storage.  
343 Since calbindin-k28D is the carrier responsible for the absorption of calcium from the digestive system, it  
344 would have the ability to modulate its deposition in the womb [46], in addition to intestinal absorptive  
345 capacity [45], influencing the production and the eggshell quality.

## 346 **Intestine**

347 For all treatments (temperatures and methionine levels), anti-calbindin-k28D was positive  
348 throughout the duodenal epithelium; the lamina propria (connective tissue layer below the epithelium)  
349 was not positive (Fig 1). Positivity was more intense in the basal and more apical portion of the



350 epithelium, since the middle portion was an area that had many enterocyte nuclei and the present marking  
351 is cytoplasmic. The most positive area was the apical surface of the enterocytes. In contrast, goblet cells  
352 were not positive for anti-calbindin-k28D. These results corroborate the study carried out in layers, which  
353 states that in the intestine of layers, there is calbindin-D28k positivity (protein) in all segments, higher in  
354 the duodenum and jejunum, especially in the apical portions of the villi, but smaller in the ileum [41,47].

355         Anti-calbindin-k28D positivity in duodenal intestine epithelium corroborates calcium absorption  
356 in this region. The greater intensity of positivity in the apical portion of enterocytes corroborates previous  
357 studies [41] that cite calbindin-k28D as a cellular calcium transport. This transporter binds to calcium  
358 absorbed by the cell and diffuses it into the cytoplasm, which is finally extruded by  $CA_2 + -ATPase$  into  
359 the basolateral membrane, reaching the vascular system through lamina propria vessels [41]. The form  
360 present in birds is 28kDa molecular weight, or calbindin-D28k, present in the kidney, brain and intestine  
361 and uterus of birds [20,42-44].

362         Goblet cells are not positive, since these cells have no function of absorption, but of production;  
363 they are responsible for producing and releasing mucin on the intestinal surface, as well as in other  
364 organs.

365         Among the temperatures studied, there was lower positivity to the calcium transport at 24 and  
366 28°C (S1D Fig), when compared to 20°C, and mainly to 32°C. At temperatures with lower positivity, the  
367 increase in methionine level had even lower positivity to anti-calbindin-k28D. At 32°C (heat stress),  
368 methionine supplementation (120%) also led to lower positivity for calbindin-D28k when compared to  
369 the 100% level.

370         The decrease in positivity could be explained by the increased availability of calcium and  
371 consequently less need for absorption, and increased eggshell quality, which actually occurred in the  
372 present study. Although the performance model of calbindin-D28k has already been described in layers,  
373 this is the first study in quails. In a study with methionine supplementation in diets with lower protein  
374 levels in Thailand, a country with thermal similarities to that of northeastern Brazil, there was an increase  
375 in laying production rates, including increased eggshell thickness [14]. In the aforementioned study, the

376 increase in methionine must also have minimized the deleterious effect of heat stress and increased  
377 calcium availability to improve production rates, as occurred in the present study. It can be imagined that  
378 in this study the positivity of calbindin-D28k must also have decreased.

379

380 **Fig 1. Photomicrographs of anti-calbindin-D28k immunohistochemistry in laying quail intestine at**  
381 **different magnifications.** Positive anti-calbindin-D28k intestinal epithelium (arrows) and non-positive  
382 goblet cells (arrowheads) (A and B) are observed. Non-antibody-positive crypts (asterisk) are also  
383 observed (C). Lower epithelial positivity is observed under 28°C (D) when compared to other  
384 temperature treatments. Chromogen staining diaminobenzidine+hematoxylin.

385

386 High temperature stress negatively affects laying performance, decreasing feed intake, live weight  
387 gain and efficiency [48,49]. It also decreases egg production and eggshell quality and thickness [50-53]  
388 due to decreased availability of calcium ions [53]. It is important to say that increasing dietary calcium  
389 does not improve the quality of the shell in heat stress conditions [54,55]. High temperature heat stress  
390 decreases the presence of calbindin-D28k in the ileum, cecum, colon, and uterus of birds, causing  
391 deterioration of eggshell quality [56]. However, in this study we observed that the effect on the duodenum  
392 is the opposite, heat stress decreases the positivity to calbindin-D28k.

393 In the present study, at temperatures considered to be of higher thermal comfort for the quails (24  
394 and 28°C), these animals presented lower positivity of the cellular calcium transport in their duodenal  
395 epithelia, exactly because they were in better thermal comfort, and did not need a higher absorption of  
396 calcium (Fig 2). Literature provides studies [57] that show that the higher the ambient temperature and  
397 thermal stress, the greater the need to supplement dietary calcium, as the animals will need more calcium  
398 for their metabolism, since the thermal stress decreases the availability of calcium [53]. Within the 24 and  
399 28°C treatments, methionine supplementation provided even lower positivity for anti-calbindin-k28D  
400 when compared to normal levels. The gene expression of this same gene followed a similar model in  
401 gross values; however, these results were not significant (Fig 5), perhaps due to the small sample size  
402 and/or the large standard deviation. Another similar fact was that methionine supplementation also

403 decreased gene expression of this gene (Fig 6). Therefore, it is assumed that methionine supplementation  
404 leaves more calcium available, which makes the need for lower intestinal calcium absorption necessary.

405 The greatest positivity was at the temperature of thermal stress (32°C), when it is thought to have  
406 less calcium available, which increases the need for calcium. Thus there were more calcium transporters  
407 (calbindin-k28D) (higher positivity) to provide greater absorption to maintain the production. The  
408 positivity at the temperature of 20°C is intermediate, because for quails, this temperature is already  
409 relatively low, thus, the animal already feels some result of thermal stress, in this case for low  
410 temperature, changing its physiology, and also needing more calcium. This explains the slightly higher  
411 positivity at 20°C than that found in the 24 and 28°C treatments.

412 This is the first study to cite calbindin-d28k protein expression in the intestine of laying quails,  
413 and it is also the first to demonstrate the influence of high temperature heat stress on this calcium  
414 transport.

## 415 **Kidney**

416 Calbindin exists in 2 major forms: with low molecular weight, a 9kDa protein (Calbindin-D9k)  
417 present in mammalian intestines, and another with high molecular weight with 28kDa (Calbindin-D28k),  
418 present in the kidney of birds [20,42] and mammalian kidneys [20]. In the present study, anti-calbindin-  
419 d28k positivity was found in the distal contorted tubules (DCT) of the nephrons, but there is practically  
420 no positivity in the proximal tubules. This positivity in DCT was intense in the region surrounding the  
421 large renal blood vessels (Fig 2). The renal corpuscle, as well as the glomerulus (capillaries), were not  
422 positive for anti-calbindin-d28k.

423 Calbindin-d28k positivity was higher in DCTs, as these are the sites of greatest mineral resorption,  
424 including calcium [58]. The proximal contoured tubule (DCT) showed little positivity by not resorbing  
425 this mineral normally and in the renal corpuscle there is no positivity, as this portion of the nephron does  
426 not absorb or reabsorb, only filters blood resulting in pre-urine.

427 The most antibody positive areas were exactly the areas of DCT around large vessels in the renal  
428 cortex. This feature can be explained by the fact that these areas have blood with a higher amount of  
429 calcium, which has not yet been reabsorbed.

430 The positivity is lower at 24 and 28°C compared to at 20 and 32°C. In the treatment at 32°C, the  
431 amount of positive DCT increased, always in greater numbers near the great renal veins (Fig 2). At 28  
432 and 32°C, DCT were more positive when compared to previous temperatures.

433

434 **Fig 2. Photomicrographs of anti-calbindin-D28k immunohistochemistry on kidney of quail laying at**  
435 **different temperatures.** A) 20°C: Positivity occurs mainly in distal contorted tubules near large vessels  
436 (asterisks). B and C) 24 and 28°C: Lower antibody positivity. D) 32°C: There are more positive distal  
437 contorted tubules and slightly positive proximal contorted tubules as well. More positivity (brown color)  
438 is observed at temperatures 20 and 32°C. Chromogen staining diaminobenzidine+hematoxylin.  
439 Magnification 100x.

440

441 In the treatments in which the animals are theoretically in greater thermal comfort, that is, in the  
442 24 and 28°C treatments, the anti-calbindin-d28k positivity was lower. Since stress by high temperatures  
443 negatively affects the performance of layers [48, 49] due to decreased availability of calcium ions [53], it  
444 is expected that the rate of renal resorption will have to increase under stress. Thus, animals in thermal  
445 comfort would have less need to reabsorb large amounts of calcium, as occurred in treatments with 24  
446 and 28°C (lower positivity). In animals with some degree of thermal stress, such as at 32°C (high  
447 temperature) and at 20°C, theoretically because it is a temperature below the thermal conformation for the  
448 species, they would have greater need to reabsorb more calcium (higher positivity).

449 Although it is well known that thermal stress by high temperatures decreases the presence of  
450 calbindin-D28k in the ileum, cecum, colon and uterus of birds, causing deterioration of eggshell quality  
451 [56], there was no information in literature on the influence of this calcium transport at renal level for  
452 thermal stress by high or low temperatures, as seems to occur at a temperature of 20°C. Thus, this is the

453 first report on the influence of heat stress on such a transport in the kidney, which, like the intestine, has  
454 the opposite effect to that found for other organs in other experiments with layers [56].

455 In the case of high temperature heat stress treatment, more DCT were positive for anti-calbindin-  
456 d28k, which shows that under such a situation not even increased positivity was enough to reabsorb the  
457 calcium needed for the production of these birds; in addition to the increase in the expression of this  
458 transport, the increase in the number of DCT that expressed such transport was needed (Fig 3).

459

460 **Fig 3. Immunohistochemistry photomicrographs of anti-calbindin-D28k in kidney of laying quail at**  
461 **different temperatures.** A) 24°C: Note poor positivity in distal contorted tubules (arrowheads) and no  
462 positivity in proximal contorted tubules (asterisks). B) 32°C: In thermal stress there is intense positivity of  
463 the distorted contorted tubules (arrowheads) and low intensity in the proximal contorted tubules  
464 (asterisks). Chromogen staining diaminobenzidine + hematoxylin. Magnification 400x.

465

466 Most intriguing was that at the two higher temperatures (28 and 32°C), the positivity of PCT also  
467 increased, so it seems that the animal physiologically adapts to reabsorb calcium, not only by DCT but  
468 also by PCT in case of high temperature stress.

469 Methionine supplementation does not appear to alter protein expression of the calbindin-d28k  
470 calcium transport. Therefore, such supplementation would not improve calcium utilization in animals  
471 under thermal stress conditions.

## 472 Uterus

473 Positivity to anti-calbindin-D28K was high in the uterine glands, since these are the sites of  
474 calcium carbonate production and secretion, which is produced and released for eggshell production in  
475 the uterus, and is influenced by increased circulating estrogen [46], and modulates eggshell production  
476 and quality. Uterine gland cells transport calcium from their basal portion to the apical surface during  
477 calcium carbonate production, the more calcium carbonate, the faster the egg production and/or better

478 eggshell quality. The epithelium (ciliated pseudostratified) is not positive for anti-calbindin-D28k except  
479 for a thin layer on the apical portion of this epithelium.

480 The positivity pattern was higher at 24 and 28°C, lower in the treatment in which the animals were  
481 submitted to 32°C, and intermediate at 20°C (Fig 4). Methionine supplementation by 120% increased  
482 anti-calbindin-D28k positivity.

483

484 **Fig 4. Photomicrographs of anti-calbindin-D28k immunohistochemistry in uterus of laying quails at**  
485 **different temperatures (20, 24, 28 and 32°C) and supplemented with 120% methionine at 32°C.** A) 20°C:  
486 observe lower positivity in the uterine glands (asterisk). B) 24°C: observe greater positivity in the  
487 uterine glands (asterisk). C) 28°C: observe greater positivity in the uterine glands (asterisk). D) 32°C:  
488 observe lower positivity in the uterine glands (asterisk). E) 32°C: supplemented with 120% methionine.  
489 More positive than treatment without methionine supplementation. Arrowheads (uterine epithelium),  
490 asterisks (uterine glands). DAB + hematoxylin chromogen staining. 400x magnification.

491

492 Ebeid et al. [56] state that under conditions of thermal stress by high temperature there is a  
493 decrease in the presence of calbindin-D28K in the uterus of laying hens, which corroborates the present  
494 study, in which the anti-calbindin-D28K positivity was lower at 32°C. This is the first time this fact is  
495 observed in quails. Stress by high temperatures is already known to negatively affect the performance of  
496 layers [48,49] due to decreased availability of calcium ions [53]. This can be explained by heat stress  
497 reducing the conversion of vitamin D3 to its metabolically active form, 1.25 (OH) 2D3, which is essential  
498 for calcium absorption and utilization. In fact, the calcium requirement for layers increases with high  
499 ambient temperatures [57].

500 Methionine supplementation at high temperatures (32°C) promoted increased positivity in the  
501 uterine glands (Fig 5) reversing part of the deleterious effect of thermal stress. The increase in positivity  
502 of this transport under thermal stress conditions possibly increased uterine gland calcium carbonate  
503 excretion for eggshell production, improving egg quality, although not reaching thermal comfort values

504 (Table 4). Given these facts, methionine supplementation is recommended under thermal stress  
505 conditions.

506 The fact that the positivity of the 20°C treatment was intermediate shows that perhaps for quails,  
507 which have high heat resistance, this temperature is already below the ideal temperature for them.

## 508 **PCR in Real Time (QPCR) for TRPV6 and Calbindin-D28k**

509 TRPV6 acts as an epithelial channel of calcium in organs and glands that are characterized by high  
510 demand for calcium transport [58-60]. According to some studies [61,62], this ion channel exerts a  
511 facilitator effect on calcium entry into epithelial cells, expressed in the intestinal and kidney absorption  
512 and resorption epithelia, but there is still little information about its expression pattern in laying hens [19],  
513 and none in laying quails. Calbindin, in turn, has been described in studies in its two main forms,  
514 Calbindin-D9k (low molecular weight protein) present in mammal intestines, and Calbindin-D28k (high  
515 molecular weight protein) in kidney, brain and intestine and uterus of birds [20,42] and kidney of  
516 mammals [20].

517 Calbindin-D28k gene expression (Fig 5) in the kidneys of laying quails without methionine  
518 supplementation was higher at 28°C, a temperature that is still within thermoneutrality. With methionine  
519 supplementation, the highest expression was at 24°C. By comparing the expression of this transport  
520 within each temperature (supplemented but not with methionine), it is possible to say that methionine  
521 supplementation only increases Calbindin-D28k gene expression at 24°C (thermoneutrality), that is, by  
522 supplementing methionine we can maximize calcium reabsorption at the renal level, which can increase  
523 egg production by producing thicker eggshells in less time. However, under conditions of heat stress,  
524 supplementation is not effective in reducing the deleterious effects of heat, at least for this gene at the  
525 renal level.

526 For the TRPV6 ion channel gene in the same organ, the highest gene expression in animals  
527 without supplementation occurred at a temperature of 20°C, already mentioned as a temperature below  
528 thermal comfort for laying quails. In animals submitted to methionine supplementation, the highest peak

529 of gene expression occurred at a temperature of 24°C (thermoneutral), coinciding with the result obtained  
530 in the calbindin gene, followed by a temperature of 32°C. Unlike calbindin, when comparing within each  
531 temperature (supplemented and not), we see that methionine supplementation increased TRPV6 gene  
532 expression, not only at 24°C but also at 32°C, that is, under thermal stress conditions. This result  
533 demonstrates physiologically and technically validates the use of methionine supplementation for laying  
534 quails in cases of thermal stress, and its effectiveness in minimizing the deleterious effects of high  
535 temperatures. Such an increase in this gene increases calcium reabsorption, making more of the mineral  
536 available for egg production, specifically in the release by the uterus for eggshell production.

537

538 **Fig 5. Graphs of the effects of methionine supplementation (100% and 120%) at different**  
539 **temperatures** on the Calb 28 (A) and TRPV6 (B) genes expressions in the kidneys; Calb 28 (C) and  
540 TRPV6 (D) in the intestine; and Calb 28 (E) and TRPV6 (F) in the uterus of Japanese quails (*Coturnix*  
541 *japonica*) in production phase. <sup>a,b,A,B</sup> Averages followed by the same lower case letter for 100%  
542 supplementation and upper case for 120% supplementation do not differ from each other by the SNK test  
543 by up to 5% error probability; \*\*, \* and <sup>ns</sup> Indicate, respectively, significant differences up to 1%, up to  
544 5% and not significant by the F test.

545

546 These results corroborate studies that already cited the gene expression of both genes (TRPV6 and  
547 Calbindin-D28k) in kidney tissue of the laying birds [20,42], and still stands out for being the first to  
548 demonstrate the positive expression of their gene expression, in the kidneys of laying quails.

549

550 In the intestine there was gene expression for both genes in all treatments, corroborating another  
551 study regarding the presence of calbindin-D28k in layers [63]. This is also the first study to demonstrate  
552 TRPV6 gene expression in intestines of laying quails. However, it was not possible to observe gene  
553 alteration of Calbindin-D28k or TRPV6 with increasing temperature, nor with methionine  
554 supplementation. These results imply that there is no alteration in the absorption or cellular calcium  
transport during thermal stress, nor is there any improvement with methionine supplementation.



555 The TRPV6 gene, when compared to calbindin, showed little expressiveness in intestinal tissue in  
 556 all the treatments, however, contradicting and filling in the gap left by some authors [42,63-64], who  
 557 claim that the presence of TRPV6 is still uncertain in birds, including layers or quails. Although the  
 558 difference was not significant due to the high standard deviation, high temperatures seemed to decrease  
 559 intestinal TRPV6 gene expression.

560 For uterine tissue, Calbindin-D28K and TRPV6 gene expression also occurred in all treatments,  
 561 and as for intestine, it was poor for TRPV6. Temperature increase and methionine supplementation did  
 562 not influence gene expression of calbindin-D28k or TRPV6. Thus, the uterine tissue is not altered under  
 563 these conditions either, thus not justifying the use of methionine supplementation.

564 The results described and observed in this study show the gene expression of TRPV6 and  
 565 Calbindin-D28k genes in the renal, intestinal and uterine tissues of laying quails. Corroborating studies in  
 566 laying hens [45-47] indicating that calbindin-D28k would modulate the intestinal calcium absorption and  
 567 deposition capacity in the uterus, influencing eggshell production and quality, as well as the significant  
 568 presence of TRPV6 (protein and mRNA) in the intestines and kidneys of layers [19].

569 Through analysis of variance, it was possible to verify the interaction between temperature and  
 570 supplementation for both genes in the kidney ( $p \leq 0.01$ ), supplementation for calbindin-D28k in the  
 571 intestine ( $p \leq 0.01$ ) and temperature for TRPV6 in the uterus (Table 5).

572 **Table 5. Analysis of Variance Summary (Mean Squared) for the effects of different temperatures**  
 573 **and methionine supplementation (100% and 120%) on *Calb 28* and TRPV6 gene expressions in the**  
 574 **kidneys, intestine and uterus of Japanese quails (*Coturnix japonica*) in the production stage**

| Variation source | G1 | Kidney         |              | Intestine      |              | Uterus         |              |
|------------------|----|----------------|--------------|----------------|--------------|----------------|--------------|
|                  |    | <i>Calb 28</i> | <i>TRPV6</i> | <i>Calb 28</i> | <i>TRPV6</i> | <i>Calb 28</i> | <i>TRPV6</i> |
| Temperature      | 3  | 0.63ns         | 0.12ns       | 22.85ns        | 0.54ns       | 2.29ns         | 61.66*       |
| Supplementation  | 1  | 0.62ns         | 0.26ns       | 197.63**       | 0.93ns       | 8.36ns         | 45.33ns      |
| Temp. vs Suplem. | 3  | 2.00**         | 0.79**       | 16.57ns        | 0.29ns       | 9.22ns         | 54.33ns      |

575 \*, \*\*, and ns indicate, respectively, significant differences up to 5%, up to 1%, and not significant by the F test.

576 In addition, the responses of calbindin-D28k and TRPV6 in the kidney, intestine and uterus of  
 577 Japanese quails supplemented with methionine + cystine (100% and 120%) at different temperatures

578 showed a strong positive correlation ( $r = 0.90^*$ ) in the kidneys and moderately positive ( $r = 0.69^*$ ) in the  
579 intestines between Calb 28 and TRPV6 gene expressions (Fig 6), indicating that both calbindin-D28k and  
580 TRPV6 (mRNA) act synergistically, modulating resorptive (kidney) and absorptive (intestine) capacity,  
581 and subsequent calcium deposition by the uterus. The correlations between the other variables were weak  
582 and not significant.

583

584 **Fig 6. Pearson correlation for alterations in Calb 28 and TRPV6 gene expressions in the rim,**  
585 **intestine and uterus of Japanese quail (*Coturnix japonica*) supplemented with methionine (100%**  
586 **and 120%) at different temperatures in the production phase.**

587

## 588 **Conclusion**

589 For the first time, this study brings histomorphological and expression variations (mRNA and  
590 protein) of TRPV6 and Calbindin-D28k in organs involved with absorption, reabsorption and calcium  
591 deposition in quails. It still physiologically justifies the use of methionine supplementation (120%) in  
592 thermal stress, since it reduces the deleterious effect on intestine, kidney and uterus parameters, besides  
593 improving others in the same organs under thermoneutrality conditions.

## 594 **References**

- 595 1. Instituto Brasileiro de Geografia e Estatística, Produção da Pecuária Municipal, Rio de Janeiro.  
596 2016;44:29-31.
- 597 2. Pereira DF, Vale MM, Zevolli BR, Salgado DD. Estimating mortality in laying hens as the  
598 environmental temperature increases. Rev Bras Cienc Avic. 2010;12:265-271.
- 599 3. Albino LFT, Carvalho BR, Maia RC, Barros VRSM. Galinhas Poedeiras: Criação e Alimentação.  
600 Viçosa, Minas Gerais: Aprenda Fácil; 2014.
- 601 4. Carvalho LSS. Nutrição de poedeiras em clima quente. Rev Cient Eletrônica Med Vet. 2012;9(18).

- 602 5. Mello JF. Influência dos níveis de cálcio e fósforo na dieta de matrizes de codornas japonesas, no  
603 desempenho produtivo e no desenvolvimento ósseo embrionário da progênie [dissertation]. Maringá  
604 (PR): Universidade Estadual de Maringá; 2015.
- 605 6. Nascimento DCN, Sakomura NK, Siqueira JC. Exigências de metionina + cistina digestível para aves  
606 de corte ISA Label criadas em semiconfinamento. R Bras Zootec. 2009;38(5):869-78.
- 607 7. Viriden WS, Kidd MT. Estresse fisiológico em frangos de corte: Ramificações na digestibilidade e  
608 respostas de nutrientes. J Appl Poult Res 2009;18(2):338-47.
- 609 8. Alagawany M, Farag MR, El-Hack MA & Patra A. Heat stress: effects on productive and reproductive  
610 performance of quail. Worlds Poult Sci J. 2017;73(4):747-56.
- 611 9. D’Mello JPF. Amino Acids in Animal Nutrition. In: Felix JP, editors. Formerly of the Scottish  
612 Agricultural College Edinburgh. 2th ed. Edinburgh: CABI, 2003. P.143.
- 613 10. Klasing KC. Comparative Avian Nutrition. Davis: Cab international; 1998.
- 614 11. Summers JD, Atkinson JL, Spratt D. Supplementation of a low protein diet in an attempt to optimize  
615 egg mass output. Can J Anim Sci. 1991;71:211-20.
- 616 12. Harm RH, Russell GB. Optimizing egg mass with amino acid supplementation of a low-protein diet.  
617 Poult Sci. 1993;72:1892-6.
- 618 13. Bunchasak C, Santoso U, Tanaka K, Ohtni S, Collado CM. The effects of supplementing methionine  
619 plus cystine to a low-protein diet on the growth performance and fat accumulation of growing broiler  
620 chicks. Asian-Australas J Anim Sci. 1997;10(2):185-191.
- 621 14. Bunchasak C, Silapasorn T. Effects of adding methionine in low-protein diet on production  
622 performance, reproductive organs and chemical liver composition of laying hens under tropical  
623 conditions. Int J Poult Sci. 2005;4(5):301-8.
- 624 15. Júnior JPF. Níveis de metionina+cistina digestíveis para aves de reposição leves nas fases inicial e  
625 cria [dissertation]. Areia (PB): Universidade Federal da Paraíba; 2013.
- 626 16. Lopes GM. Biodisponibilidade relativa e níveis de metionina para frangos de corte. [dissertation].  
627 Areia (PB): Universidade Federal da Paraíba; 2014.

- 628 17. Pinheiro SG. Relação energia metabolizável: aminoácidos sulfurosos para aves leves. [dissertation].  
629 Areia (PB): Universidade Federal da Paraíba; 2014.
- 630 18. Santana MHM. Níveis de metionina+cistina para galinhas poedeiras leves nas fases de recria e  
631 postura. [dissertation]. Areia (PB): Universidade Federal da Paraíba; 2014.
- 632 19. Yang JH, Hou JF, Farquharson C, Zhou ZL, Deng YF, Wang L, Yu Y. Localisation and expression of  
633 TRPV6 in all intestinal segments and kidney of laying hens. *Br Poult Sci.* 2011;52(4):507-16.
- 634 20. Fleet JC, Schoch RD. Molecular mechanisms for regulation of intestinal calcium absorption by  
635 vitamin D and other factors. *Crit Rev Clin Lab Sci.* 2010;47(4):181-95.
- 636 21. Ramos AH, Santos LM, Miglino MA, Peres JA, Guerra R R. Biometria, histologia e morfometria do  
637 sistema digestório do cachorro-do-mato (*Cerdocyon thous*) de vida livre. *Biotemas.* 2011;24(4):111-9.
- 638 22. Ishak K, Baptista A, Bianchi L, Callea F, de Groote J, Gudat F, et al. Gradação histológica e  
639 estadiamento da hepatite crônica. *J Hepatol.* 1995;22(6):696-9.
- 640 23. Pfaffl MW. Um novo modelo matemático para quantificação relativa em RT-PCR em tempo  
641 real. *Pesquisa de ácidos nucleicos.* 2001;29(9):e45
- 642 24. Cody R. An Introduction to SAS University Edition. Cary, NC: SAS Institute. 2015. 366 p.
- 643 25. Mitchell MA, Carlisle AJ. The effects of chronic exposure to elevated environmental temperature on  
644 intestinal morphology and nutrient absorption in the domestic fowl (*Gallus domesticus*). *Comp Biochem*  
645 *Physiol A Comp Physiol.* 1992;101:137-142.
- 646 26. Lin H, Jeao HC, Buyse J, Decuypere E. Strategies for preventing heat stress in Poultry. *Worlds Poult*  
647 *Sci J, Ithaca.* 2006;62(1):71-86.
- 648 27. Marchini CFP, Silva PL, Nascimento MRBM, Beletti ME, Guimarães EC, & Soares HL. Morfometria  
649 da mucosa duodenal em frangos de corte submetidos à temperatura ambiente cíclica elevada. *Arq Bras*  
650 *Med Vet Zootec.* Belo Horizonte. 2009;61(2):491-7.
- 651 28. Araújo LF, Junqueira OM, Lopes EL, da Silva Araújo CS, Ortolan JH, & de Laurentiz AC. Utilização  
652 de levedura desidratada (*Saccharomyces cerevisiae*) para leitões na fase inicial. *Cienc Rural.*  
653 2006;36(5):1576-1581.

- 654 29. Santos RR, Awati A, Roubos-Van Den Hil PJ, Tersteeg-Zijderveld MH, Koolmees PA, Fink-  
655 Gremmels J. Quantitative histo-morphometric analysis of heat-stress-related damage in the small  
656 intestines of broiler chickens. *Avian Pathol.* 2015;44(1):19-22.
- 657 30. Wu QJ, Liu N, Wu XH, Wang GY, Lin L. Glutamine alleviates heat stress-induced impairment of  
658 intestinal morphology, intestinal inflammatory response, and barrier integrity in broilers. *Poult Sci.* 2018;  
659 97(8):2675-2683.
- 660 31. Furlan RL, Macari M, Luquetti BC, editors. Como avaliar os efeitos do uso de prebióticos,  
661 probióticos e flora de exclusão competitiva. Anais 5º Simpósio Técnico de Incubação, Matrizes de Corte  
662 e Nutrição, 2004, Balneário Camboriú, SC, BRA. 2004.
- 663 32. Sandikci M, Eren U, Onol AG, Kum S. The effect of heat stress and the use of *Saccharomyces*  
664 *cerevisiae* or (and) bacitracin zinc against heat stress on the intestinal mucosa in quails. *Revue Méd Vét.*  
665 2004;155(11):552-556.
- 666 33. Mehaisen GM, Ibrahim RM, Desoky AA, Safaa HM, El-Sayed OA, Abass AO. The importance of  
667 propolis in alleviating the negative physiological effects of heat stress in quail chicks. *PLoS One.*  
668 2017;12(10):e0186907.
- 669 34. Nyoni NMB, Grab S, Arche ERM. Heat stress and chickens: climate risk effects on rural poultry  
670 farming in low-income countries. *Clim Dev.* 2019;11:83-90.
- 671 35. Figueiredo DF, Murakami AE, dos Santos Pereira MA, Furlan AC, Toral FLB. Desempenho e  
672 Morfometria da Mucosa de Duodeno de Frangos de Corte Alimentados com Farelo de Canola durante o  
673 Período Inicial. *R Bras Zootec.* 2003;32(6):1321-9.
- 674 36. Lana GRQ, Rostagno HS, Albino LFT, Lana AMQ. Efeito da temperatura ambiente e da restrição  
675 alimentar sobre o desempenho e a composição da carcaça de frangos de corte. *R Bras Zootec.* 2000;29:  
676 1117-23.
- 677 37. Rosa PS. Desempenho e concentrações de alguns componentes do metabolismo intermediário de  
678 frangos com potencial de crescimento diferenciado submetidos ao estresse por calor [dissertation].  
679 Jaboticabal (SP): Universidade Estadual de São Paulo; 2005.

- 680 38. Plavnik I, Yahav S. Efeito da temperatura ambiente em frangos submetidos a restrição de crescimento  
681 em idade precoce. *Avicultura*. 1998;77(6):870-2.
- 682 39. Miller SC, editor. Calcium homeostasis and mineral turnover in the laying hen. Proceedings of the  
683 Poultry Science Symposium. 1992.
- 684 40. Sugiyama T, Kusuhara S. Avian calcium metabolism and bone function. *Asian-Australas J Anim Sci*.  
685 2001;14:82–90.
- 686 41. Sugiyama T, Kikuchi H, Hiyama S, Nishizawa K, Kusuhara S. Expression and localisation of  
687 calbindin D28k in all intestinal segments of the laying hen. *Br Poult Sci*. 2007;48(2):233-8.
- 688 42. Bar A. Calcium transport in strongly calcifying laying birds: mechanisms and regulation. *Comp*  
689 *Biochem Physiol A Comp Physiol*. 2008;152,447–69.
- 690 43. Fullmer CS, Brindak ME, Bar A, Wasserman RH. The purification of calcium-binding protein from  
691 the uterus of the laying hen. *Proc Soc Exp Biol Med*. 1976;152(2):237-41.
- 692 44. Parmentier M. Calbindin D28k is essentially located in the colonic part of the toad intestine. *Biol Cell*.  
693 1990;68(1):43-9.
- 694 45. Saki AA, Tivey DR. Immunohistochemical detection of calbindin D28k and oestrogen receptor in the  
695 small intestine of pre – and post – lay hens. *Proc Aust Poult Sci*. 1997;9.
- 696 46. Corradino RA, Smith CA, Krook LP, Fullmer CS. Tissue-specific regulation of shell gland calbindin  
697 D28K biosynthesis by estradiol in precociously matured, vitamin D-depleted chicks. *Endocrinology*.  
698 1993;132(1):193-8.
- 699 47. Wu JC, Smith MW, Mitchell MA, Peacock MA, Turvey A, Keable SJ. Enterocyte expression of  
700 calbindin, calbindin mRNA and calcium transport increases in jejunal tissue during onset of egg  
701 production in the fowl (*Gallus domesticus*). *Comp Biochem Physiol Comp Physiol*. 1993;106(2):263-9.
- 702 48. Donkoh A. Ambient temperature: a factor affecting performance and physiological response of broiler  
703 chickens. *Int J Biometeorol*. 1989;33:259-65.
- 704 49. Siegel HS. Stress, strains and resistance. *Br Poult Sci*. 1995;36:3-22.

- 705 50. Deaton JW, Reece FN, Mcnaughton JL, Lott BD. Effect of differing temperature cycles on egg shell  
706 quality an layer performance. *Poult Sci.* 1981;60:733-737.
- 707 51. Emery DA, Vohra D, Ernst RA. The effect of cycle and constant ambient temperature on feed  
708 consumption, egg production, egg weight, and shell thickness of hens. *Poult Sci.* 1984;63:2027-35.
- 709 52. Campos EJ. *Avicultura: razões, fatos e divergências.* Belo Horizonte: Editora FEPMVZ; 2000.
- 710 53. Mack LA, Felver-Gant JN, Dennis RL. Genetic variations alter production and behavioral responses  
711 following heat stress in two strains of laying hens. *Poult Sci.* 2013;92:285-94.
- 712 54. De Andrade AN, Rogler JC, Featherston WR, Alliston CW. Interrelationships between diet and  
713 elevated temperatures (cyclic and constant) on egg production and sheel quality. *Poult Sci.* 1977;56:1178-  
714 88.
- 715 55. Tanor MA, Lesson S, Summers JD. Effect of heat stress and diet composition on performance of  
716 white leghorn hens. *Poult Sci.* 1984;63:304-310.
- 717 56. Ebeid TA, Suzuki T, Sugiyama T. High ambient temperature influences eggshell quality and  
718 calbindin-D28k localization of eggshell gland and all intestinal segments of laying hens. *Poult Sci.*  
719 2012;91(9):2282-7.
- 720 57. Plavnik I, editor. *Nutrição de aves em climas quentes.* Proceedings ot the Conferência Apinco; 2003.  
721 p. 235-245.
- 722 58. Christakos S, Dhawan P, Porta A, Mady LJ, & Seth T. Vitamin D and intestinal calcium absorption.  
723 *Mol Cell Endocrinol.* 2011;347(1-2):25-9.
- 724 59. Nijenhuis T, Hoenderop JG, Van Der KAW, Bindels RJ. Localization and regulation of the epithelial  
725 Ca<sup>2+</sup> channel TRPV6 in the kidney. *J Am Soc Nephrol.* 2003;14:2731–40.
- 726 60. Hoenderop Joost GJ, Nilius Bernd, Bindels René JM. Calcium absorption across epithelia. *Physiol*  
727 *Rev.* 2005;85(1):373-422.
- 728 61. Brown AJ, Krits I, Armbrecht HJ. Effect of age, vitamin D, and calcium on the regulation of rat  
729 intestinal epithelial calcium channels. *Arch Biochem Biophys.* 2005;437:51–8.

- 730 62. Bianco SD, Peng JB, Takanaga H, Suzuki Y, Crescenzi A, Kos CH, et al. Marked disturbance of  
731 calcium homeostasis in mice with targeted disruption of the Trpv6 calcium channel gene. *J Bone Miner*  
732 *Res.* 2007;22(2):274-85.
- 733 63. Wasserman RH, Taylor AN. Vitamin D-induced calcium-binding protein in chick intestinal mucosa.  
734 *Science.* 1966;152:791-3.
- 735 64. Qin X, Klandorf H, Porter DW, Holt SB, Martin WG. Estrogen enhancement of calcium, magnesium,  
736 and calcium-magnesium stimulated adenosine triphosphatase activity in the chick shell gland. *Gen Comp*  
737 *Endocrinol.* 1993b;89:4-10.



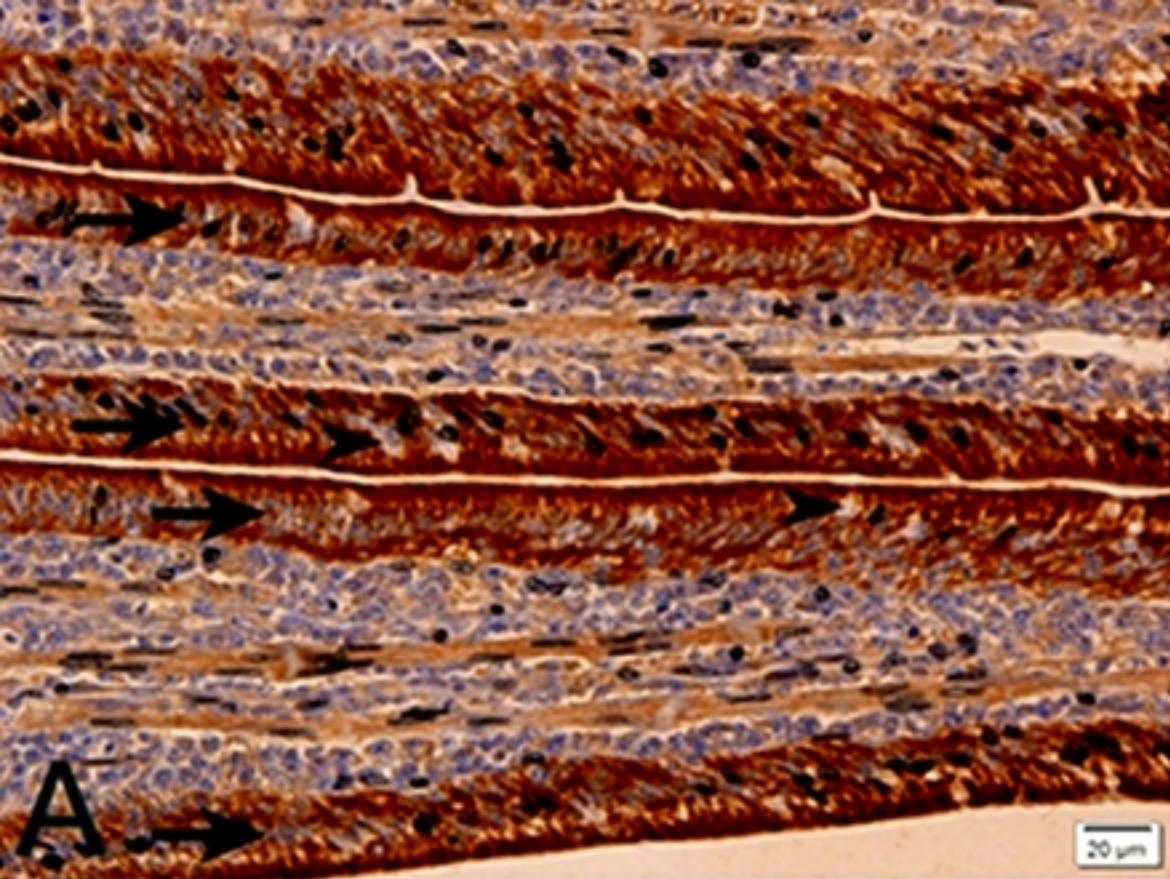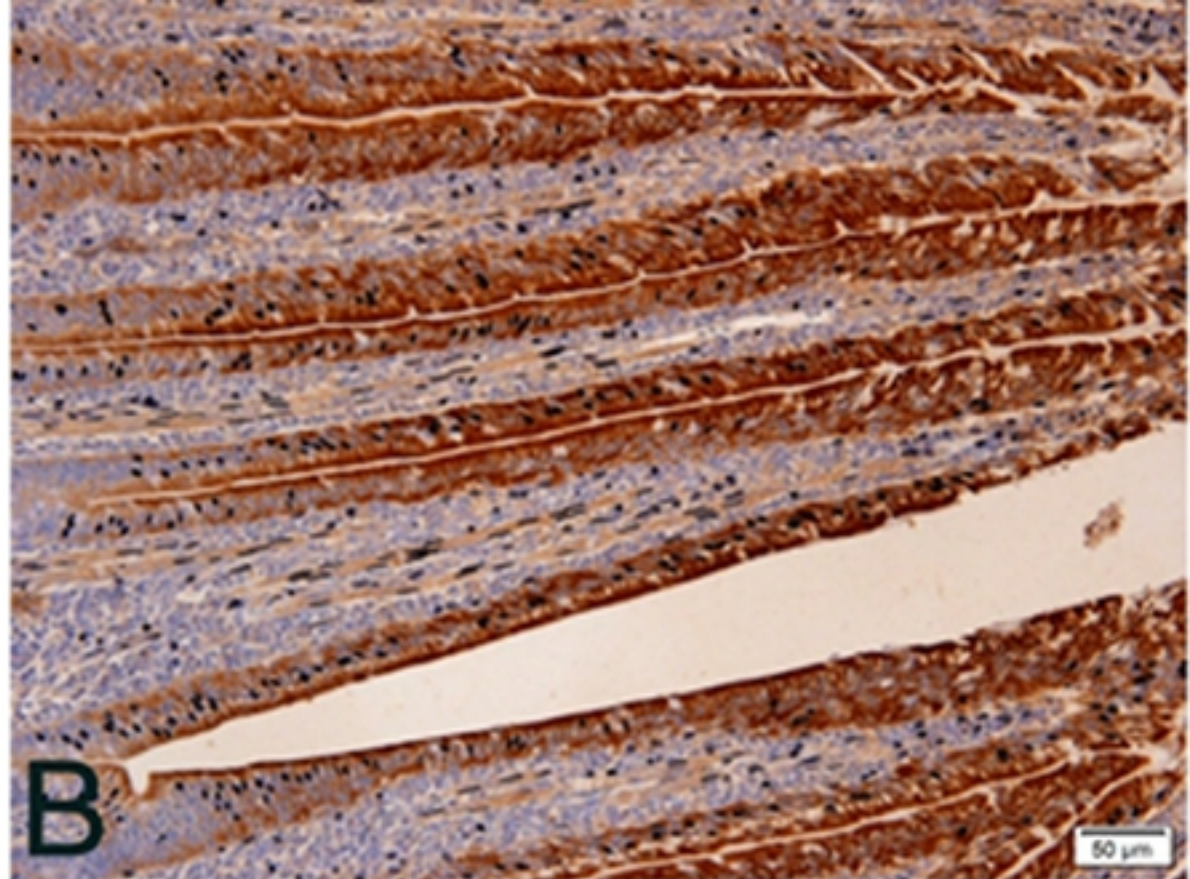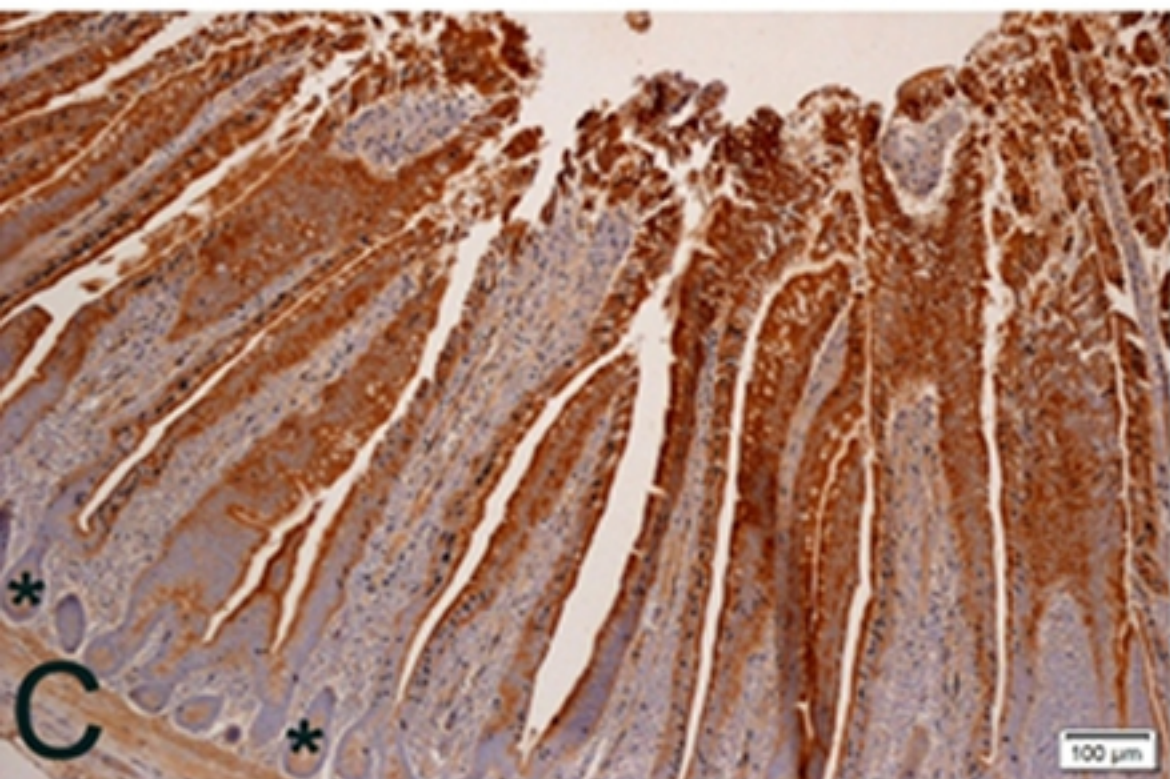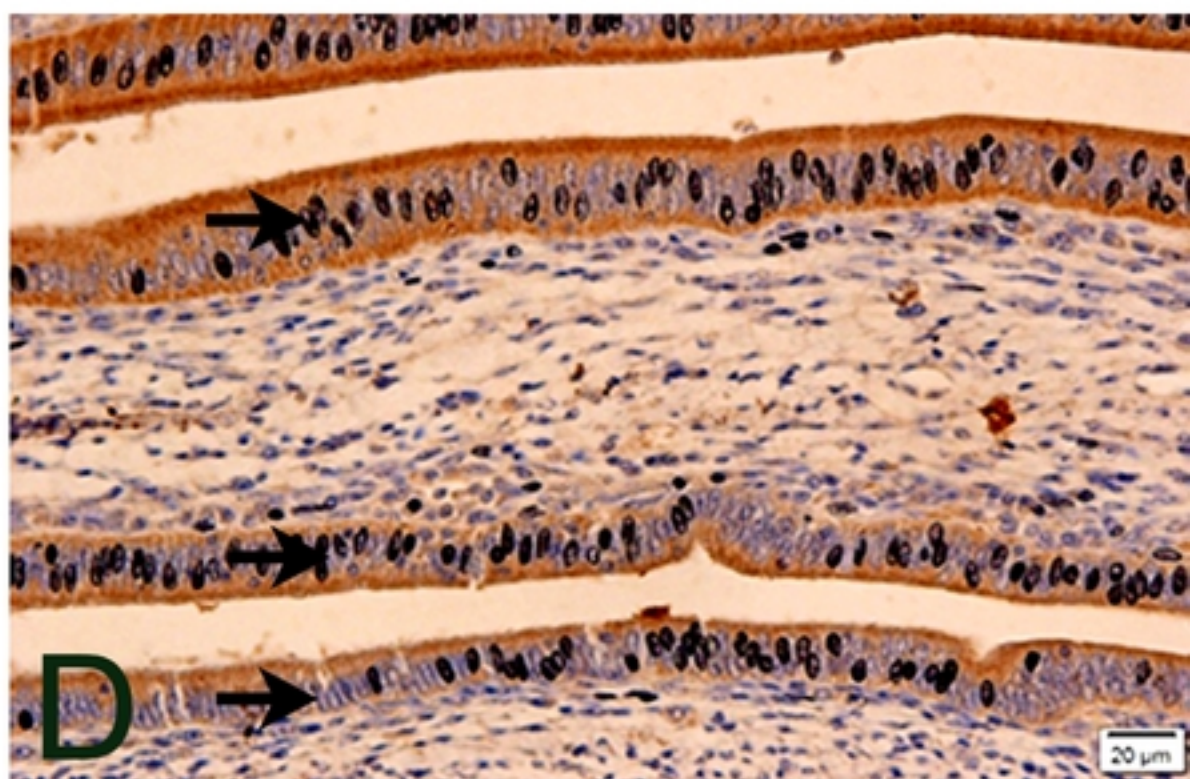

Figure 1

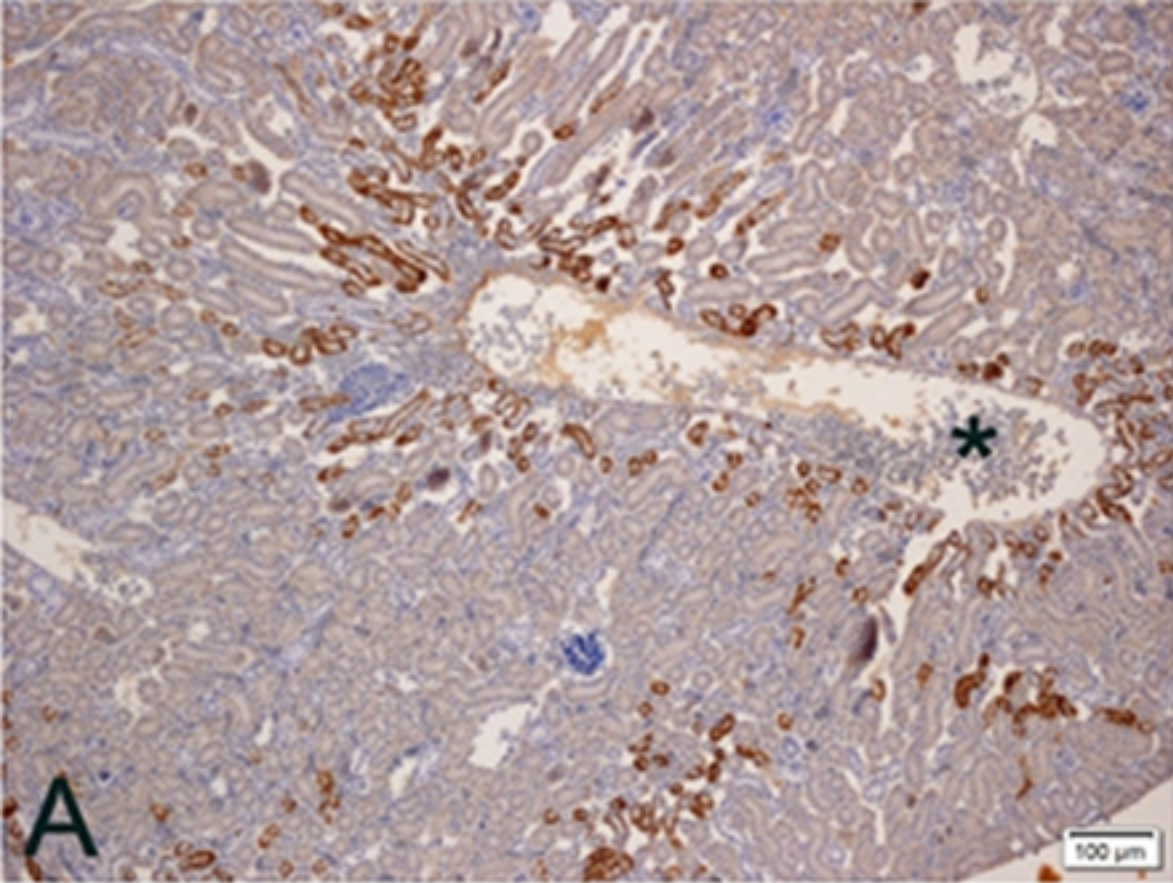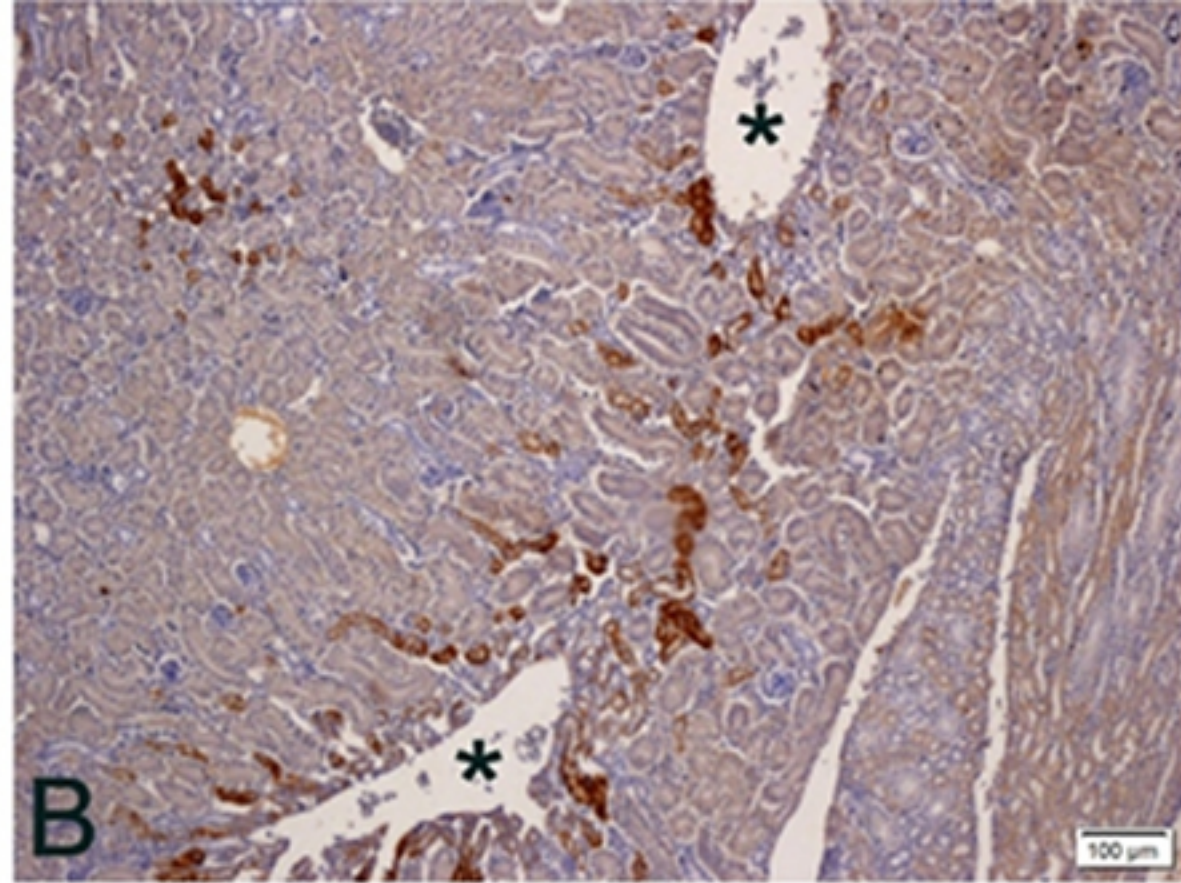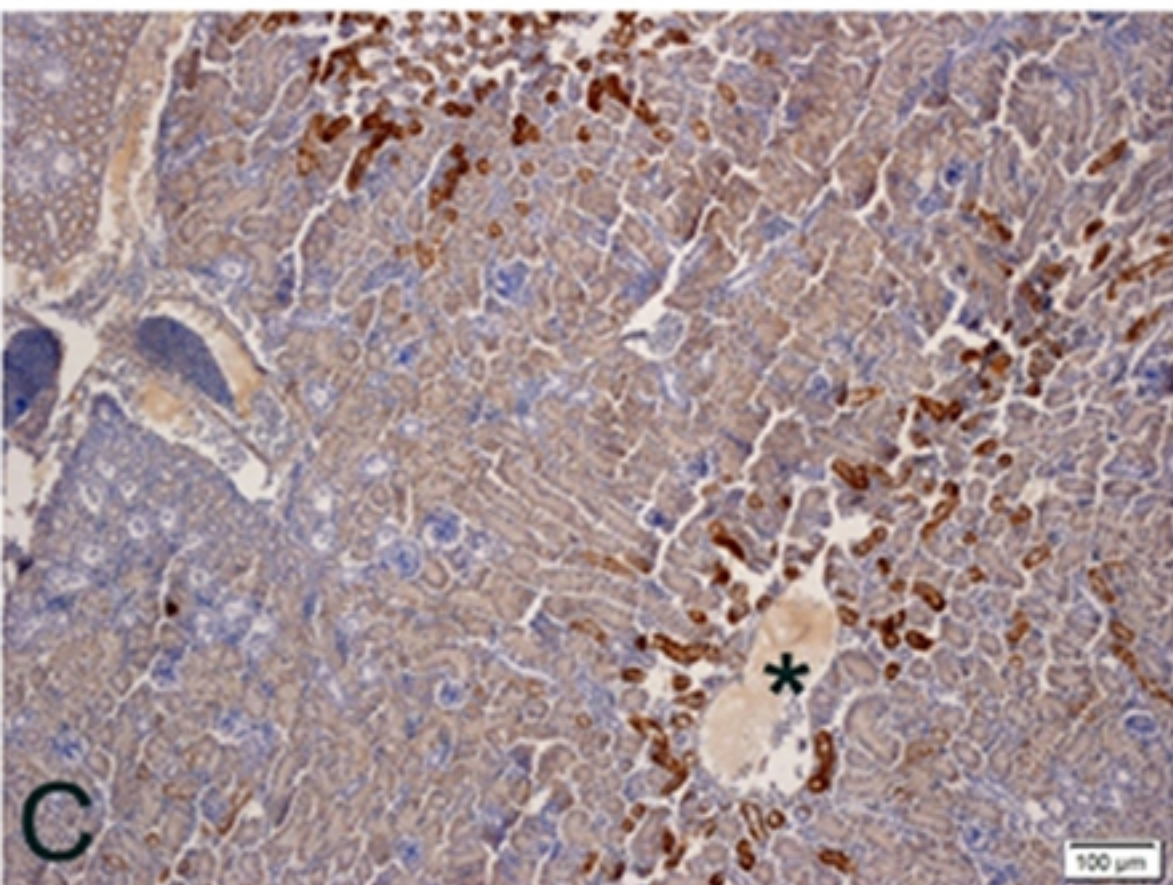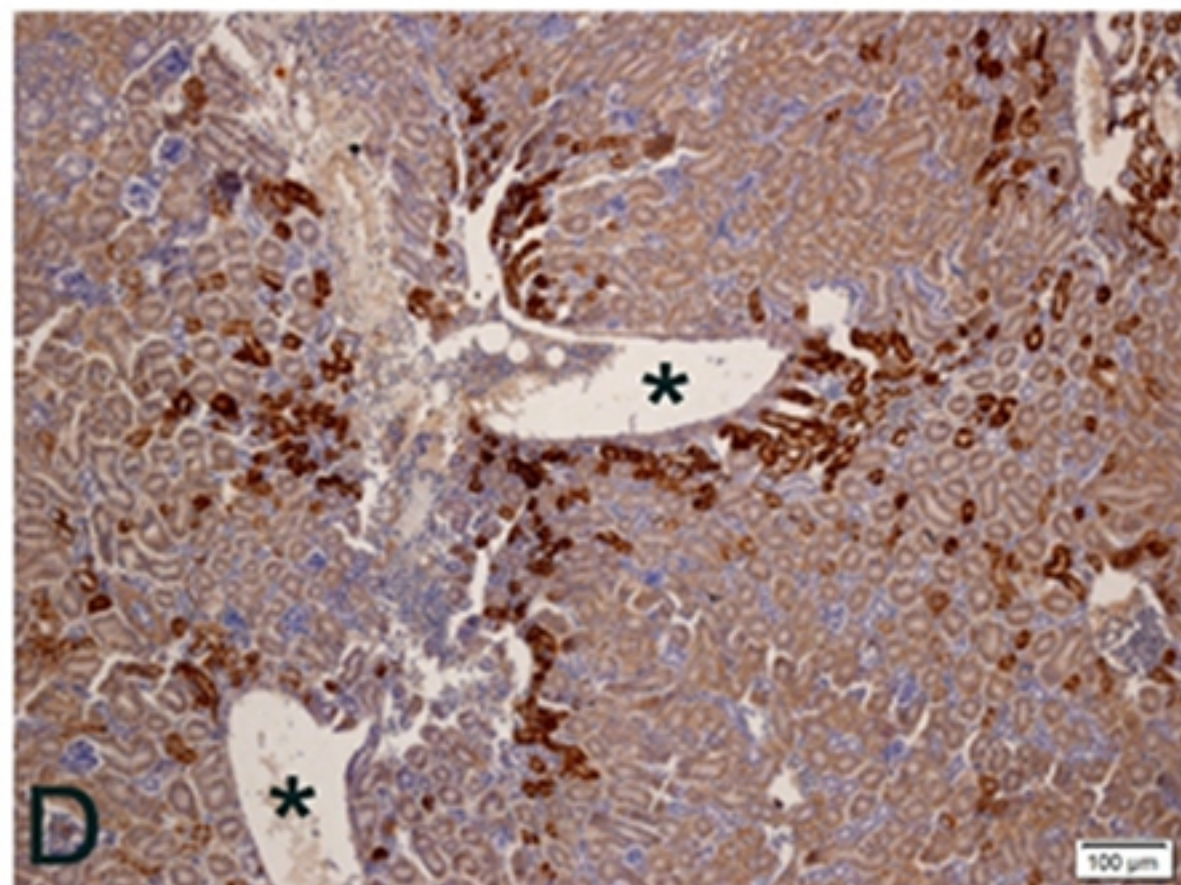

Figure 2

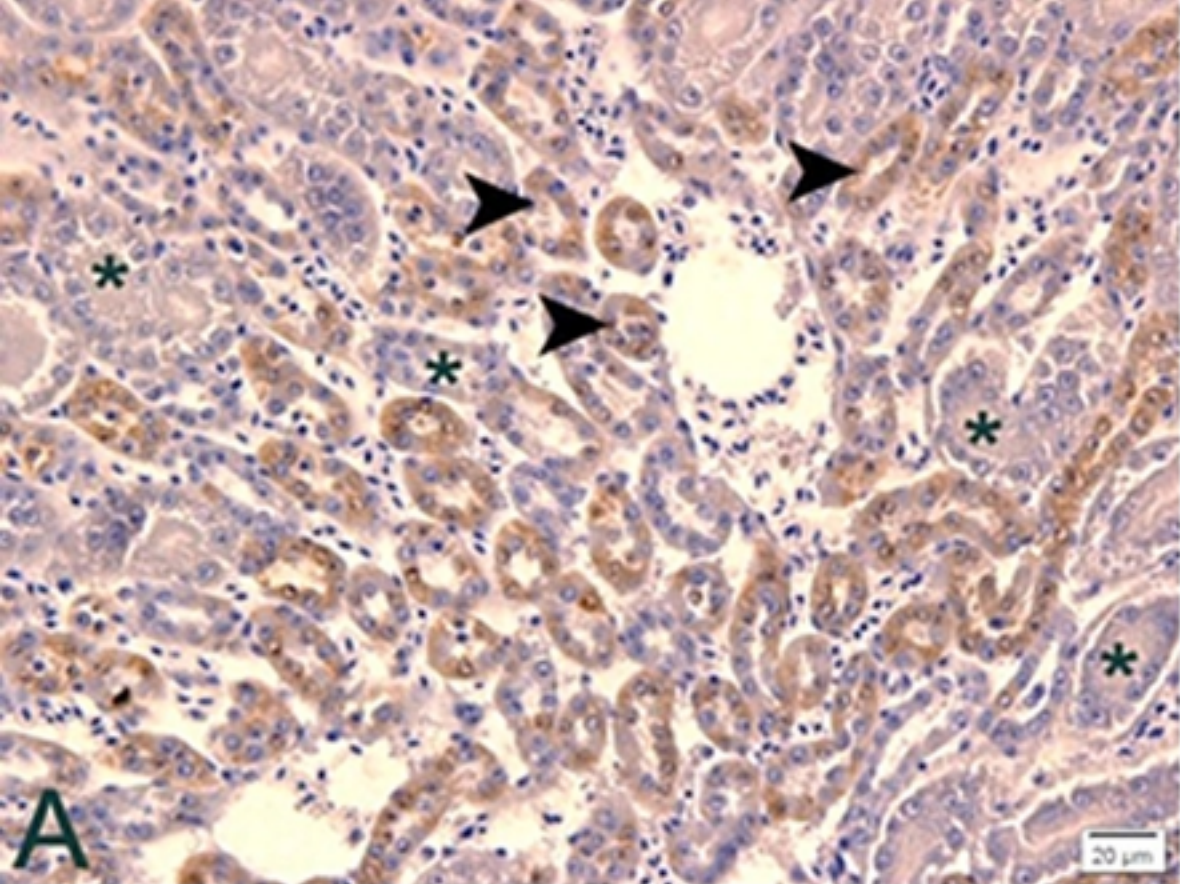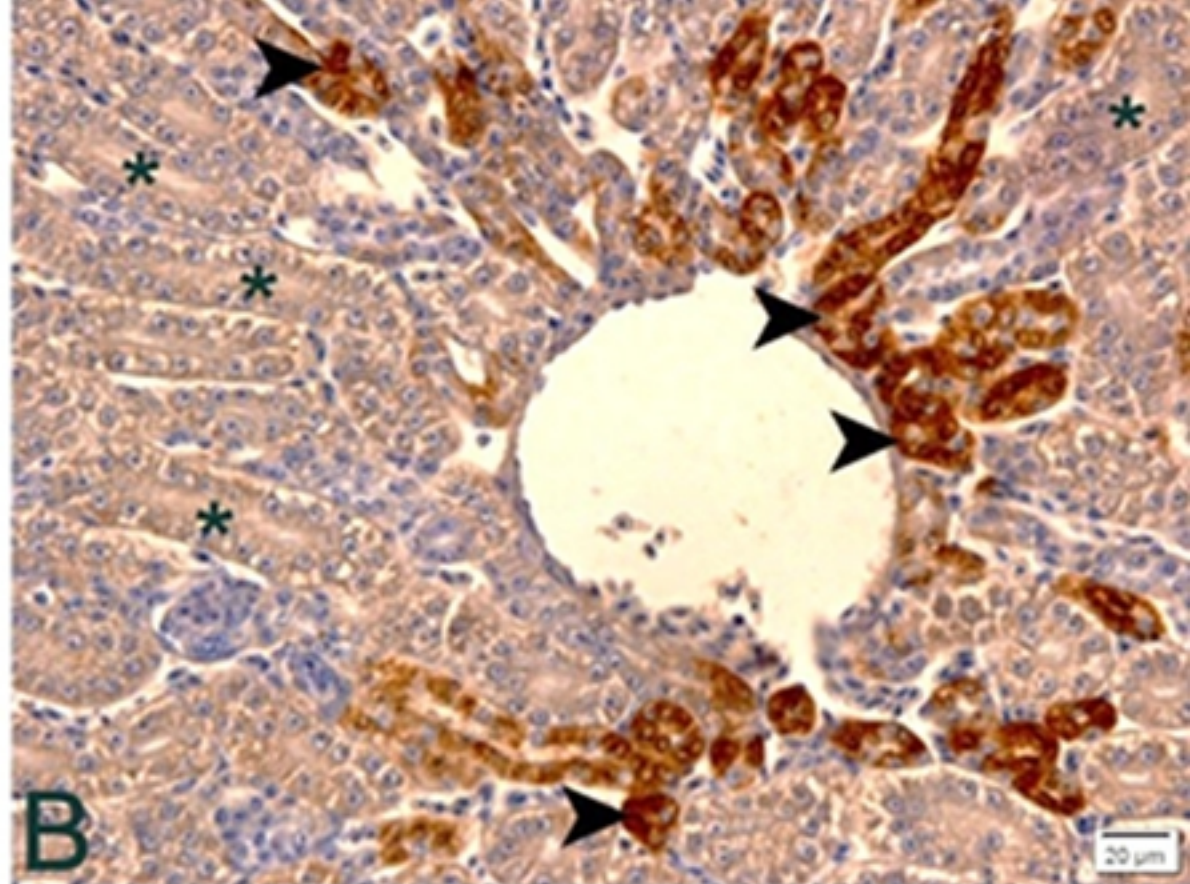

Figure 3

bioRxiv preprint doi: <https://doi.org/10.1101/2020.01.23.916551>; this version posted January 23, 2020. The copyright holder for this preprint (which was not certified by peer review) is the author/funder, who has granted bioRxiv a license to display the preprint in perpetuity. It is made available under aCC-BY 4.0 International license.

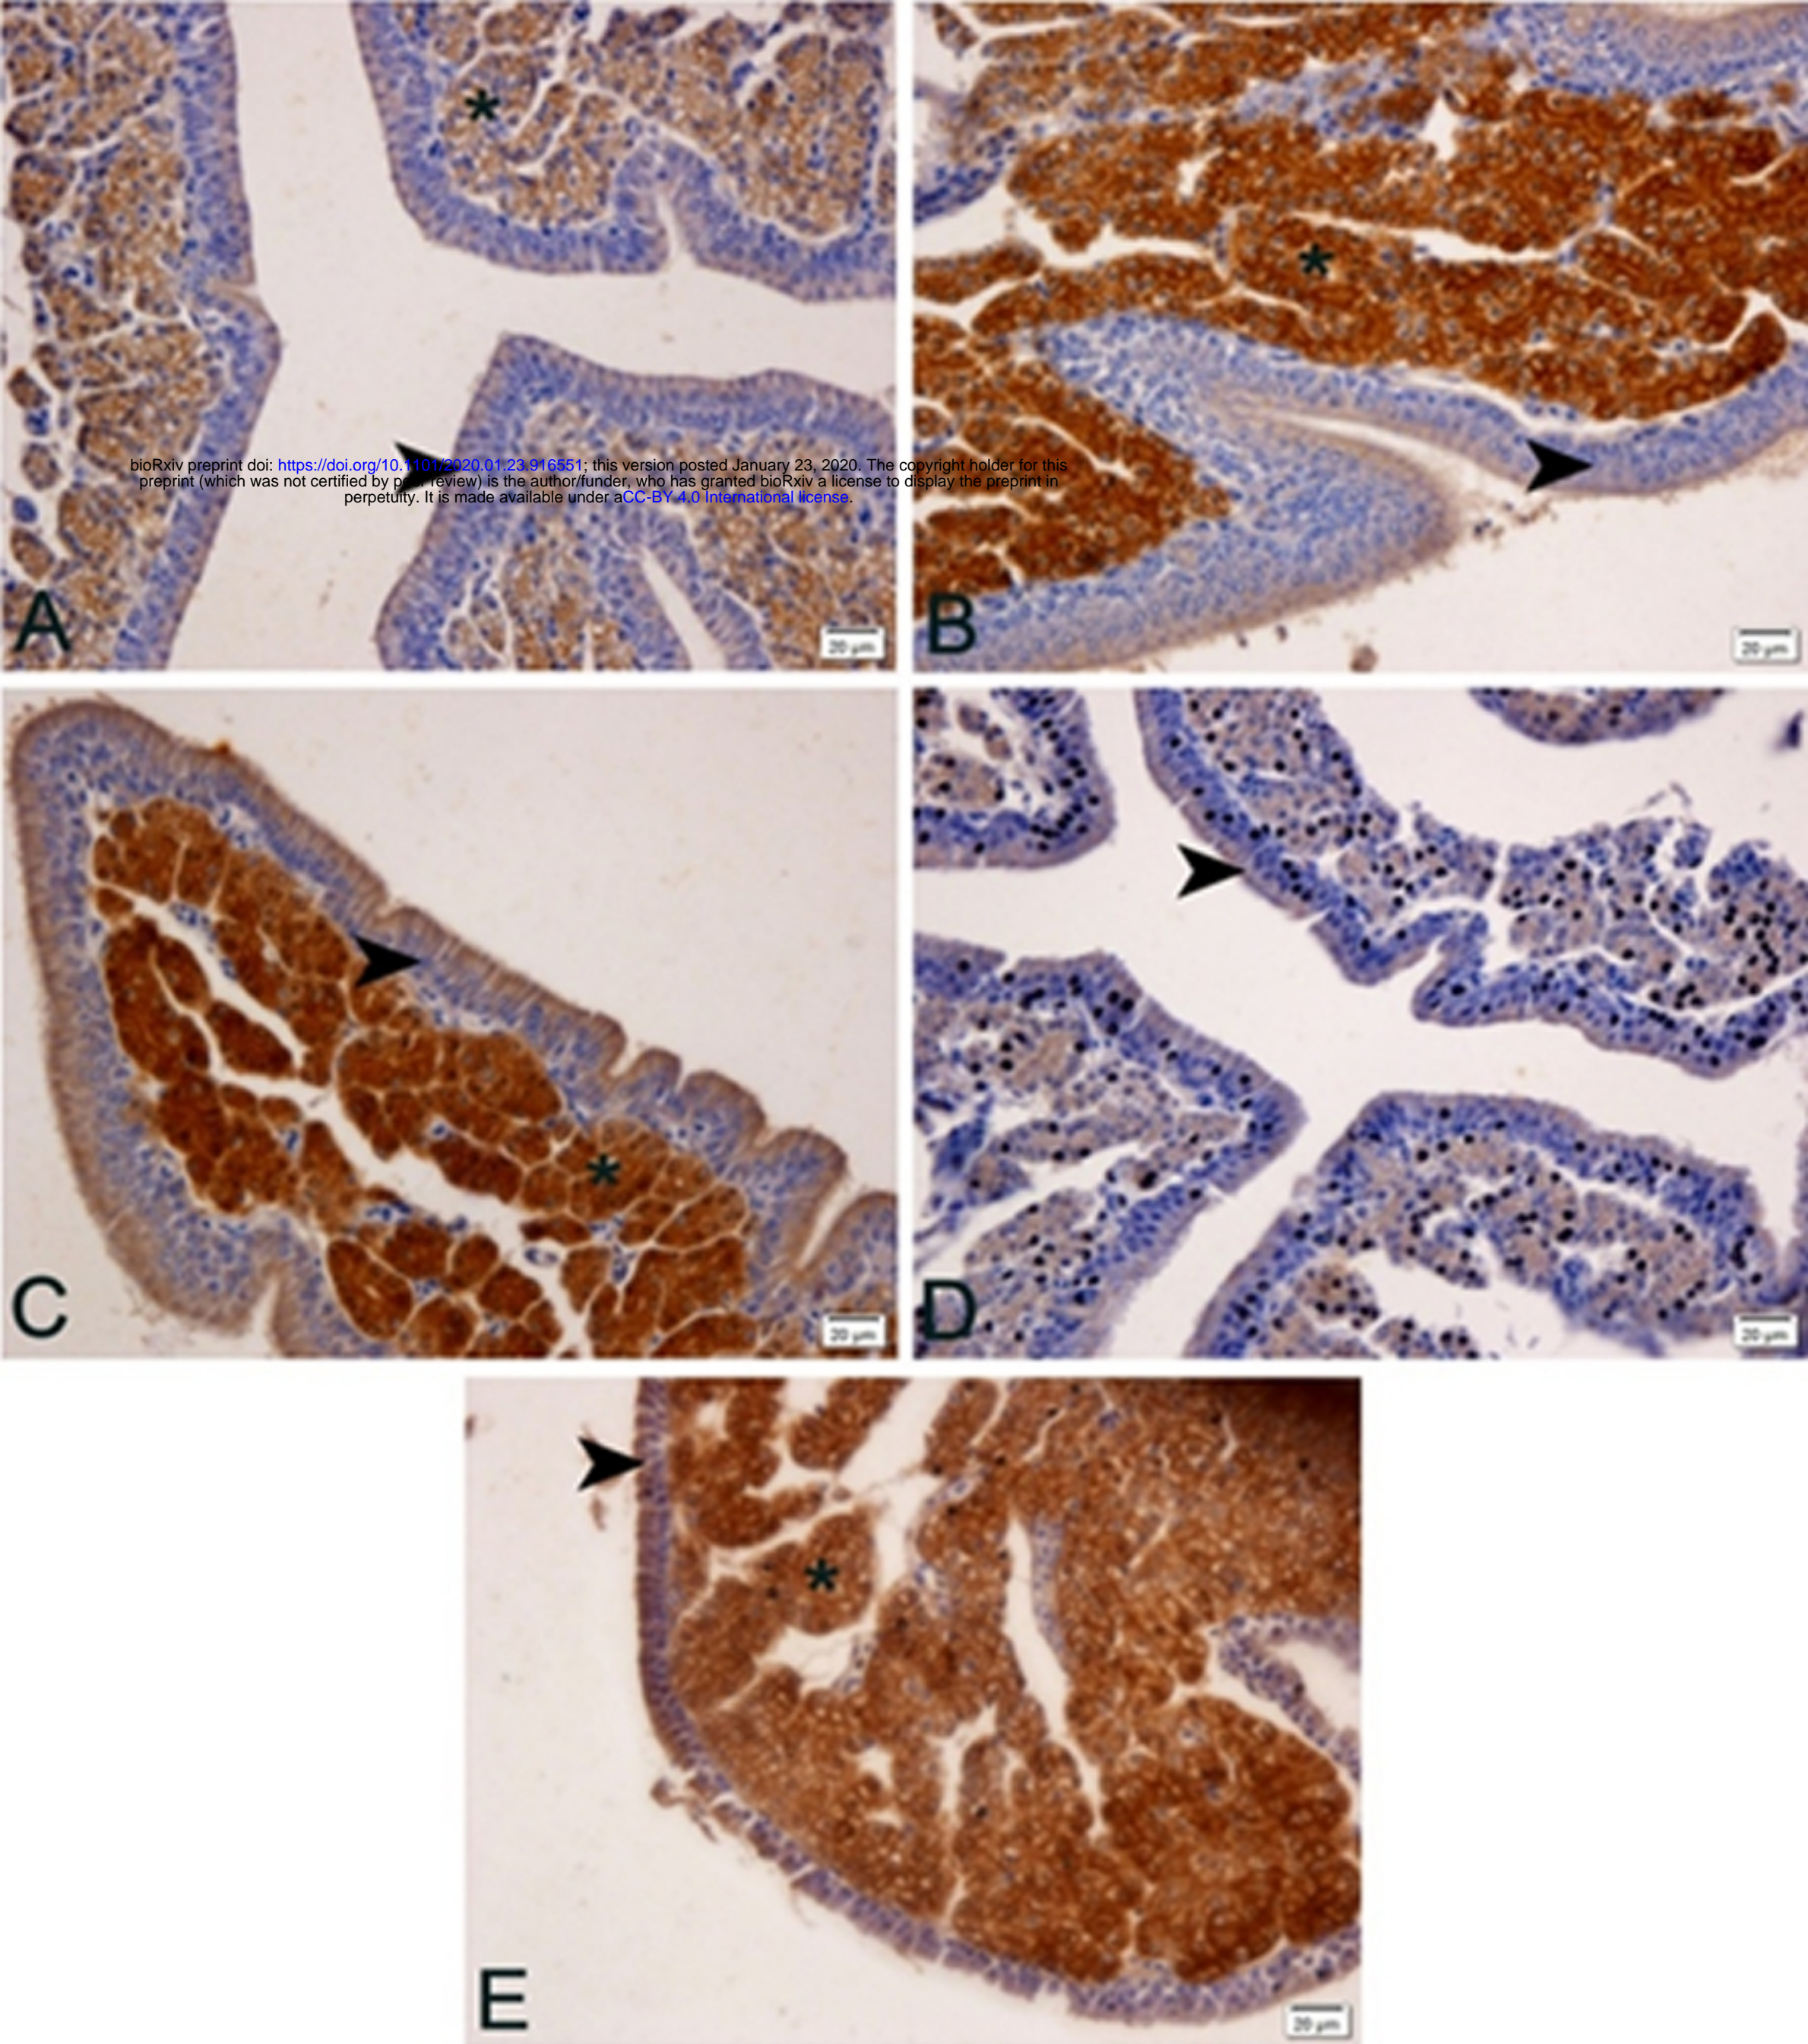

Figure 4

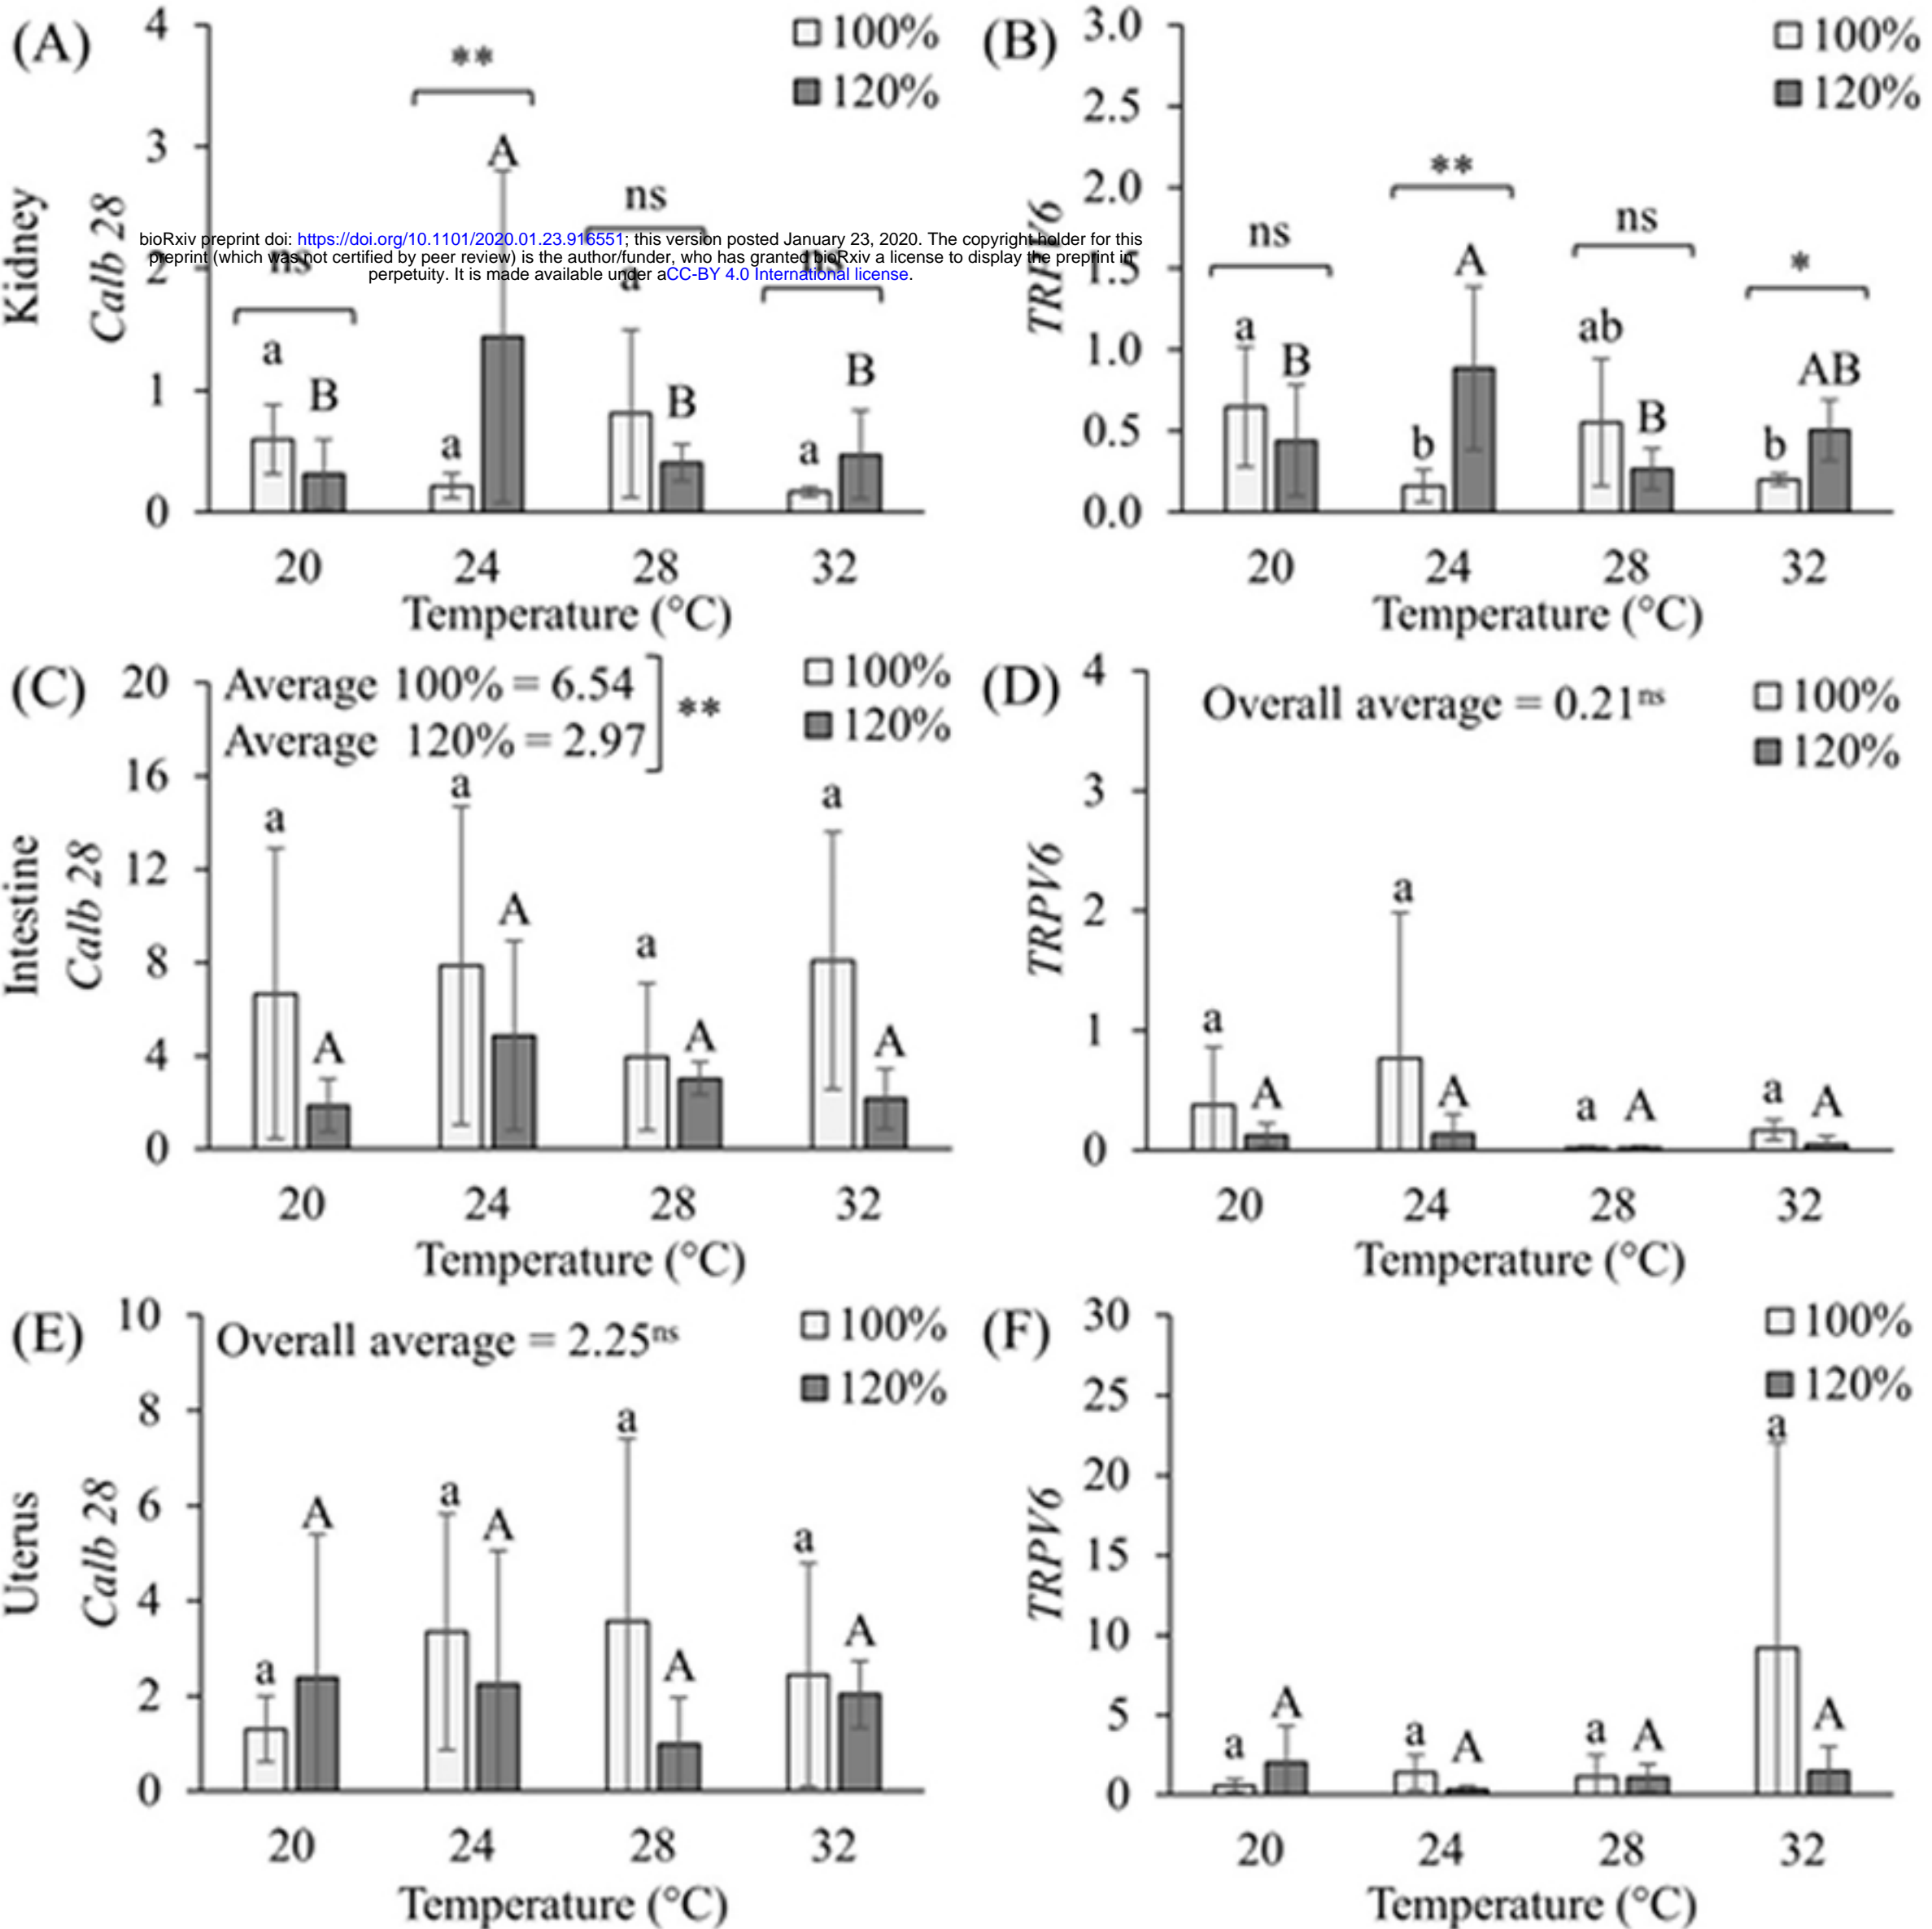

Figure 5

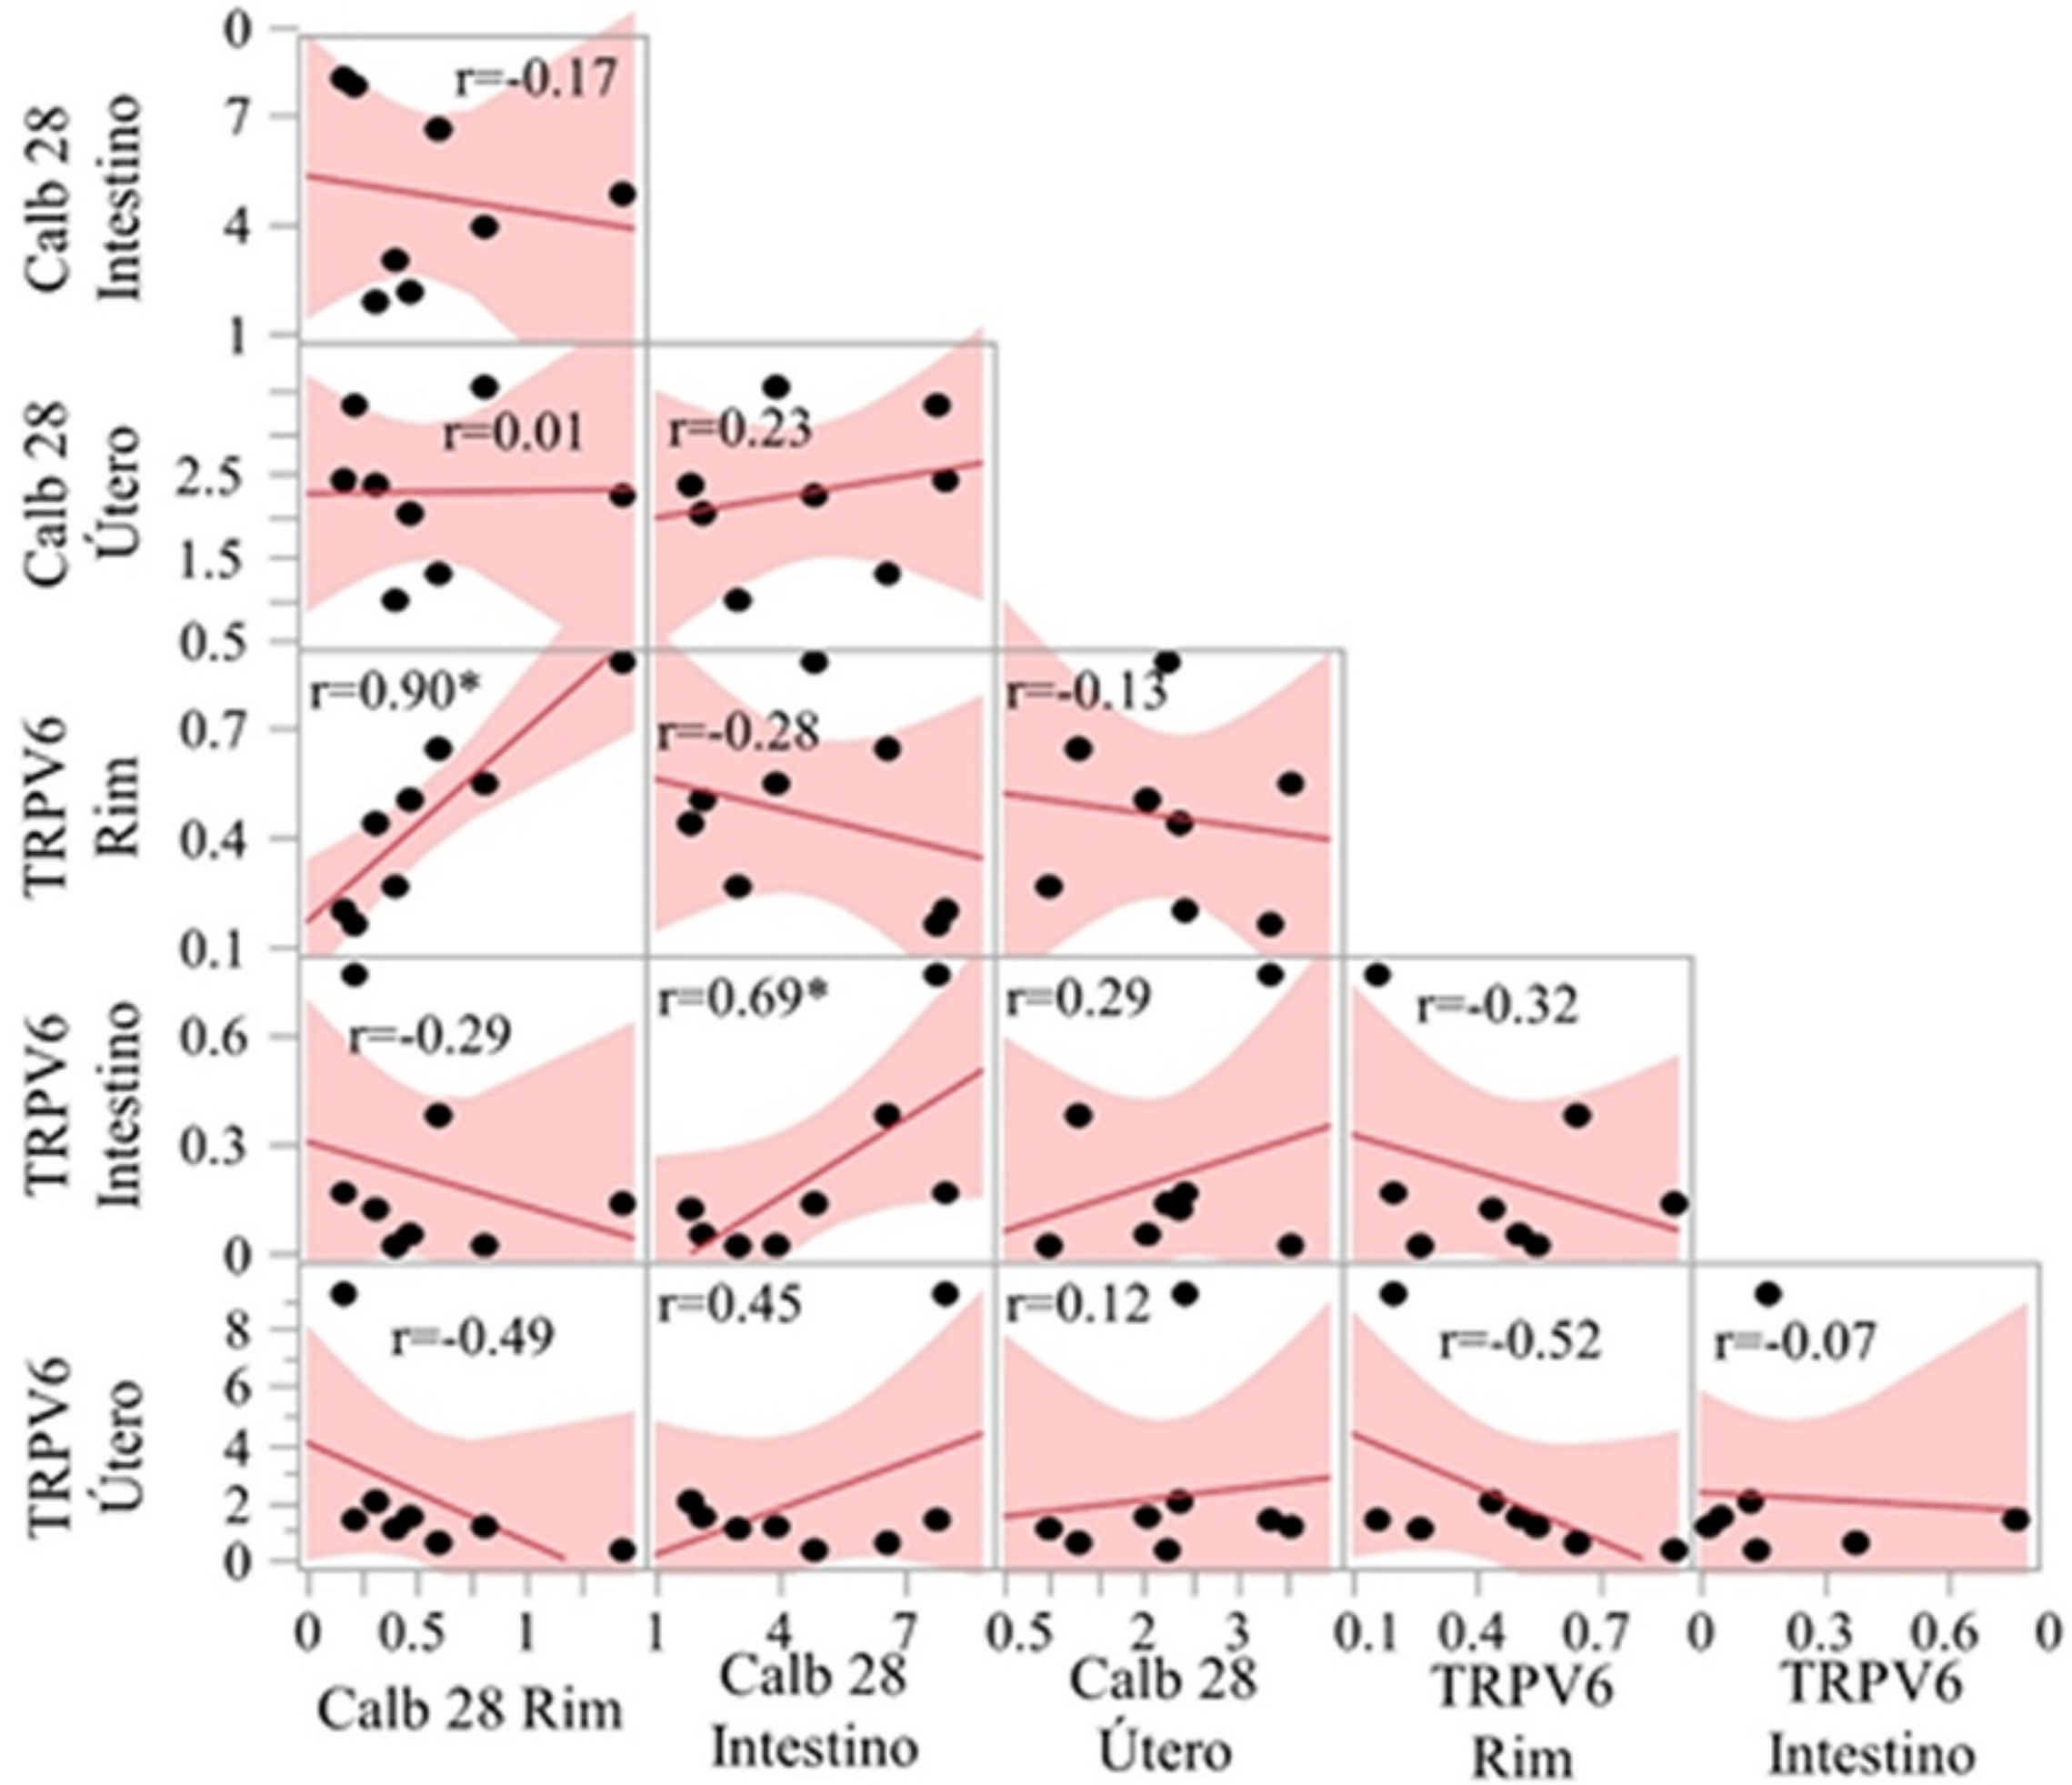

Figure 6
